# Supplementary material for: Effectiveness of interventions to improve hand motor function in individuals with moderate to severe stroke: a systematic review protocol
Source: PubMed Central journal article supplement — BMJ Open. 2019 Sep 27;9(9):e032413. doi: 10.1136/bmjopen-2019-032413 (PMC6773351; doi:10.1136/bmjopen-2019-032413), 2019-09-27
Supplement: bmjopen-2019-032413.draft_revisions.pdf [file bmjopen-2019-032413.draft_revisions.pdf]

# BMJ Open

BMJ Open is committed to open peer review. As part of this commitment we make the peer review history of every article we publish publicly available.

When an article is published we post the peer reviewers' comments and the authors' responses online. We also post the versions of the paper that were used during peer review. These are the versions that the peer review comments apply to.

The versions of the paper that follow are the versions that were submitted during the peer review process. They are not the versions of record or the final published versions. They should not be cited or distributed as the published version of this manuscript.

BMJ Open is an open access journal and the full, final, typeset and author-corrected version of record of the manuscript is available on our site with no access controls, subscription charges or pay-per-view fees (<http://bmjopen.bmj.com>).

If you have any questions on BMJ Open's open peer review process please email [info.bmjopen@bmj.com](mailto:info.bmjopen@bmj.com)

# BMJ Open

## Effectiveness of interventions to improve hand motor function in individuals with moderate to severe stroke: a systematic review protocol

|                               |                                                                                                                                                                                                                                                                                                                                                                        |
|-------------------------------|------------------------------------------------------------------------------------------------------------------------------------------------------------------------------------------------------------------------------------------------------------------------------------------------------------------------------------------------------------------------|
| Journal:                      | <i>BMJ Open</i>                                                                                                                                                                                                                                                                                                                                                        |
| Manuscript ID                 | bmjopen-2019-032413                                                                                                                                                                                                                                                                                                                                                    |
| Article Type:                 | Protocol                                                                                                                                                                                                                                                                                                                                                               |
| Date Submitted by the Author: | 17-Jun-2019                                                                                                                                                                                                                                                                                                                                                            |
| Complete List of Authors:     | Wang, Hwei; Huashan Hospital Fudan University, Arceo, Ray; Northwestern University, Physical Therapy and Human Movement Sciences<br>Chen, Shugeng; Huashan Hospital Fudan University<br>Ding, Li; Huashan Hospital Fudan University<br>Jia, Jie; Huashan Hospital Fudan University,<br>Yao, Jun; Northwestern University, Physical Therapy and Human Movement Sciences |
| Keywords:                     | Review Protocol, Hand function, Rehabilitation, Stroke < NEUROLOGY                                                                                                                                                                                                                                                                                                     |
|                               |                                                                                                                                                                                                                                                                                                                                                                        |

SCHOLARONE™  
Manuscripts

1  
2  
3  
4  
5  
6  
7  
8  
9  
10  
11  
12  
13  
14  
15  
16  
17  
18  
19  
20  
21  
22  
23  
24  
25  
26  
27  
28  
29  
30  
31  
32  
33  
34  
35  
36  
37  
38  
39  
40  
41  
42  
43  
44  
45  
46  
47  
48  
49  
50  
51  
52  
53  
54  
55  
56  
57  
58  
59  
60

BMJ-Open Manuscript

**Effectiveness of interventions to improve hand motor function in individuals with moderate to severe stroke: a systematic review protocol**

Hewei Wang<sup>1</sup>, Ray Arceo<sup>2</sup>, Shugeng Chen<sup>1</sup>, Li Ding<sup>1</sup>, Jie Jia<sup>1\*</sup>, Jun Yao<sup>2\*</sup>

**ABSTRACT**

**Introduction:** The human hand is extremely involved in our daily lives. However, the rehabilitation of hand function after stroke can be rather difficult due to the complexity of hand structure and function, as well as neural basis that supports hand function. Specifically, in individuals with moderate to severe impairment following a stroke, previous evidence for effective treatments that recovers hand function in this population is limited, and thus has never been reviewed. With the progress of rehabilitation science and tool development, results from small clinical trials have been available. The newly accumulated evidence drives the aim of this systematic review: to identify interventions that has potential to effectively increase hand function in individuals with moderate to severe stroke.

**Methods and analysis:** This systematic review protocol is consistent with the methodology recommended by the Preferred Reporting Items for Systematic Reviews and Meta-Analyses Protocols and the Cochrane handbook for systematic reviews of interventions. Electronic searches will be carried out in the PubMed, CINAHL, Physiotherapy Evidence Database (PEDro) and Cochrane Library databases, along with manual searches in the reference lists from included studies and published systematic reviews of interventions to improve upper limb or hand motor function in individuals with moderate to severe stroke. Two reviewers will screen all retrieved titles, abstracts and full texts, perform the evaluation of the risk bias and extract all data independently. In case of any unsolved disagreements after discussion, a third reviewer will be referred to as an arbitrator. The risk of bias of the included random controlled trials (RCTs) will be evaluated by the Cochrane Collaboration's tool. A qualitative synthesis will be provided in text and table, to summarize the main results of the selected publications. The quality of the included publications will be evaluated by the Grading of Recommendations Assessment, Development and Evaluation (GRADE) system from the Cochrane Handbook for Systematic Reviews of Interventions.

**Ethics and dissemination:** No ethical approval is needed, and the results of this review will be disseminated via peer-reviewed publications and conference presentations.

**Trial registration number:** The protocol has been registered on the International Prospective Register of Systematic Reviews (PROSPERO) on 10 April 2019 (registration number: CRD42019128285).

**Strengths and limitations of this study**

- To the best of our knowledge, this is the first systematic review for the effectiveness of interventions to improve hand function in individuals with moderate to severe stroke.
- The results of this systematic review will provide a detailed summary of the current progress of evidence for interventions to improve hand motor function, which will contribute to offering valuable information for therapists to help stroke survivors with moderate to severe impairment and identifying the gaps in the literature for further research.
- There may be significant heterogeneity because of wide range of outcome measures, types of intervention and duration and frequency of training.

\*Correspondence to Dr Jun Yao, j-yao4@northwestern.edu; Dr Jie Jia, shannonjj@126.com.

## INTRODUCTION

Stroke is one of the main causes of long-term disabilities among adults<sup>1</sup>. Up to 85% of stroke survivors have hemiparesis that affects the upper extremity on one side<sup>2</sup>, and less than half of them can regain proper arm function 6 months after stroke<sup>3 4</sup>. Generally, hemiparesis impacts the movement function of hand and wrist more than shoulder and elbow<sup>3 5</sup>. As we know, the hand movements play a core role in upper limb function because of its indispensable and sophisticated function in human daily lives<sup>6</sup>. Many vital activities of daily living, such as using a fork, buttoning a shirt, and opening a door handle, require various hand function<sup>7</sup>. The losses in hand function can seriously affect patients' functional independence and quality of life<sup>8</sup>.

Currently, for mildly impaired stroke survivors (about 20-25%)<sup>9</sup>, constraint-induced movement therapy (CIMT) has been reported to produce significantly greater gains in hand/arm function compared to conventional therapy<sup>10 11</sup>. However, for stroke survivors who have moderate to severe impairment and do not meet the inclusion criteria of CIMT<sup>12 13</sup>, intervention options for hand function recovery are limited. The complexity of hand structure and function together with the neural basis that supports hand function might contribute to the great difficulty of hand function rehabilitation after stroke. Enormous biomechanical complexity makes the hand extensively represented in a large region of the motor cortex of the brain<sup>14</sup>, which suggests that fine control of hand movement depends heavily on the intact corticospinal tract. When the ipsilesional corticofugal tract was seriously damaged due to stroke, contralesional motor-related cortical recruitment becomes the main neural compensatory model for these moderate to severe stroke patients according to previous studies<sup>15</sup>. Evidence to support such opinion includes that inhibition of contralesional motor cortex using transcranial magnetic stimulation<sup>16</sup> or tDCS<sup>17</sup> can lead to more disrupted performance of a simple motor task in patients with poorer motor outcome. The contralesional cortical recruitment may rely on contralesional corticobulbosplinal tract such as the corticoreticulospinal tract to control the affected upper limb<sup>18</sup>. However, the compensatory corticoreticulospinal tract branches at multiple segments in spinal cord, and innervates proximal muscles more than distal ones, and prefers the flexors but lacks comparable resolution and innervation to hand and finger extensor muscles<sup>19 20</sup>. Above features results in the abnormal involuntary coupling between shoulder abduction and wrist/finger flexion, which is also known as the "flexion synergy", as well as muscle weakness especially at extensors of distal joints, thus further constrains functional hand movements especially hand opening<sup>21 22</sup>. In short, it seems that extension at distal joints, like hand opening, depends more on the function of corticospinal track, primarily projected from the lesioned hemisphere, and lacks compensatory neural system to provide 'backup' driving. This neural basis makes effective restoration of hand function in moderate to severe stroke patients become extremely challenging. Furthermore, the resulted 'none-use-decay' can cause further decrease of the hand function. Although full of challenges, some of the research findings demonstrate that hand function recovery in this population is still feasible with evidence showing both feasibility in intervention-induced changes in behavior<sup>23 24</sup> and neural plasticity measures<sup>20</sup>. We therefore focus on hand function recovery in the group of stroke survivors with moderate to severe impairment in this systematic review.

According to our knowledge of the literature, ample summary of the efficacy of various interventions for upper limb function rehabilitation in stroke patients can be found in published systematic reviews. Most of these reviews evaluate the efficacy of a single category of therapeutic technique, such as CIMT<sup>25-29</sup>, robot-assisted therapy<sup>30-35</sup>, bilateral training<sup>36 37</sup>, task-oriented training<sup>38</sup>, exercise therapy<sup>39</sup>, functional electrical stimulation(FES)<sup>40 41</sup>, orthotics<sup>42 43</sup>, mental practice<sup>44 45</sup>, mirror therapy<sup>46 47</sup>, action observation<sup>48</sup>, non-invasive cerebral stimulation<sup>49-52</sup>, brain-

1  
2  
3 computer interface<sup>53 54</sup>, virtual reality<sup>42</sup>, home-based therapy programmes<sup>55</sup>, etc. There are also  
4 found some comprehensive systematic reviews on general function treatment of upper limb after  
5 stroke<sup>56-58</sup> or other specific problems, such as motor dysfunction<sup>59 60</sup>, sensory impairment<sup>61</sup>,  
6 spasticity<sup>62 63</sup>, decreased quality of life<sup>64</sup>, and shoulder pain and subluxation<sup>65-67</sup>. In addition, other  
7 important issues of upper limb rehabilitation after stroke, like timing of intervention<sup>68</sup>, dose of  
8 training<sup>69</sup>, effects of severity on motor recovery<sup>24</sup>, outcome measures<sup>70-75</sup> and predictors of  
9 functional restoration<sup>76 77</sup> were systematically reviewed as well. However, much less attention has  
10 been paid to the systematic review of hand function rehabilitation after moderate to severe stroke<sup>78-83</sup>.  
11 Fortunately, with growing attention to this research field in recent decades, increased number of  
12 clinical trials that focus on moderate to severe stroke patients are available now, involving various  
13 intervention methods, like EMG-triggered electrical stimulation<sup>84</sup>, transcranial direct current  
14 stimulation<sup>85</sup>, robot-assisted movement training, repetitive transcranial magnetic stimulation<sup>86</sup>, and  
15 mirror therapy<sup>87</sup>. Although with relatively small sample size, a review of these reported work will  
16 provide insight for the future direction along this line of research and thus may further impact future  
17 clinical practice for this large population.

18  
19  
20  
21  
22  
23 Comprehensive overview of hand motor function rehabilitation in individuals with moderate  
24 to severe stroke has long been neglected not only in systematic reviews but also in the main  
25 guidelines for stroke rehabilitation. In the most recent *Guidelines for Adult Stroke Rehabilitation*  
26 *and Recovery* released by the American Heart Association and the American Stroke Association in  
27 2016, we can only locate recommendations for the treatment of upper extremity activity but hardly  
28 find any evidence-based suggestions for hand function training<sup>88</sup>. The 2015 update of the *Canadian*  
29 *Stroke Best Practice Recommendations: Stroke Rehabilitation Practice Guidelines* has provided a  
30 series of recommends on the management of upper extremity following stroke, including the restore  
31 of sensorimotor function, and relief of spasticity and pain. Regarding the hand function  
32 rehabilitation after stroke, limited recommendations are scattered among evidence for upper  
33 extremity, such as FES and CIMT for hand motor function, botulinum toxin for hand spasticity and  
34 range of motion, and exercise and massage for hand edema<sup>89</sup>. Similar problems can be found in  
35 stroke rehabilitation guidelines in UK and Australia, which mainly provide recommendations on  
36 upper extremity management while lack a detailed description of the current evidence on hand  
37 function recovery<sup>90 91</sup>. The absence of systematic evidence in guidelines for hand rehabilitation  
38 following stroke greatly increases the difficulty of clinical work.

39  
40  
41  
42  
43  
44 In short, a standardized systematic review on the effectiveness of interventions is warranted to  
45 improve hand motor function in individuals with moderate to severe stroke. Therefore, the aim of  
46 this review is to provide an overview of the following:

- 47  
48  
49  
50  
51  
52  
53  
54  
55  
56  
57  
58  
59  
60
1. to identify which interventions that have been employed to increase hand function in individuals with moderate to severe stroke;
  2. to verify the effectiveness of these interventions;
  3. to identify the gaps in the literature.

## METHODS AND ANALYSES

### Study design

The review protocol was written and reported following the Preferred Reporting Items for Systematic Reviews and Meta-Analyses Protocols (PRISMA-P) (see the PRISMA checklist)<sup>92 93</sup>. For the results of this systematic review, we will publish it following the Preferred Reporting Items

for Systematic Review and Meta-Analysis (PRISMA) statement<sup>94 95</sup>.

## Eligibility criteria

### Types of study

We will include all randomized controlled trials published in English that investigated the efficacy of rehabilitation interventions to improve hand motor function in individuals with moderate to severe stroke. The random allocation process should be performed in a standard way. Quasi-RCTs or trails without control group such as case series and case reports will be excluded.

### Participants

We will include all RCTs which have recruited adult patients ( $\geq 18$  years of age) with first or recurrent stroke. Stroke is defined as ‘a clinical syndrome consisting of rapidly developing clinical signs of focal (or global in case of coma) disturbance of cerebral function lasting more than 24 hours or leading to death with no apparent cause other than a vascular origin’ by World Health Organization<sup>96</sup>. The diagnosis of stroke should be confirmed by CT or MRI. The participants in all trails should be assessed as moderate to severe unilateral hand dysfunction as indicated by hand functional assessments such as the Fugl-Meyer Upper Extremity Scale ( $< 45$ ) and Chedoke-McMaster Stroke Assessment ( $\leq$  stage 4). Patients with subarachnoid hemorrhage or subdural hematoma will be excluded. Studies with participants with transient ischemic attack will be excluded since all neurological symptoms would disappear.

### Types of interventions

We will select all trials assessing a rehabilitation method (PT/OT) that targets on the post-hand hand function regaining in stroke survivors that have moderate to severe impairment. Trials focusing only on the training of elbow and shoulder will be excluded.

The PT is defined as ‘services to individuals and populations to develop, maintain and restore maximum movement and functional ability throughout the lifespan’ and ‘physical therapy is concerned with identifying and maximizing quality of life and movement potential within the spheres of promotion, prevention, treatment/ intervention, habilitation and rehabilitation’ by the World Confederation for Physical Therapy (WCPT) (<http://www.wcpt.org/policy/ps-descriptionPT>).

The OT is defined by the American Occupational Therapy Association as the profession that ‘helps people across the lifespan to do the things they want and need to do through the therapeutic use of daily activities (occupations)’. Occupational therapy services typically include: 1) an individualized evaluation, during which the client/family and occupational therapist determine the person’s goals, 2) customized intervention to improve the person’s ability to perform daily activities and reach the goals, and 3) an outcomes evaluation to ensure that the goals are being met and/or make changes to the intervention plan (<https://www.aota.org/About-Occupational-Therapy.aspx>).

### Type of outcome measures

The primary outcomes of this systematic review will focus on changes in patients’ hand function using various assessments from baseline to the last available follow-up. The assessments can be divided into two groups<sup>72</sup>: body functions measures (targeting impairments of hand function, such as Fugl-Meyer Assessment hand part, Chedoke-McMaster Stroke Assessment, Motricity Index

etc.) and activity measures (assessing limitations of activities, such as Action Research Arm Test, Box and Block Test, Wolf Motor Function Test, etc.).

Secondary outcome measures will include kinematic analysis of hand movement, possible improvements of quality of life and possible mental health improvements related to the practice of interventions. The adverse events associated with interventions and adherence to treatment will also be considered.

### Search strategy for the identification of relevant studies

Electronic searches will be performed for potentially eligible RCTs in the PubMed, CINAHL, Physiotherapy Evidence Database (PEDro) and Cochrane Library databases with restriction in articles with full texts in English. All databases will be searched between January 1999 and January 2019. Searches will combine terms from medical subject headings (MeSH) and keywords in title, abstract and text for the population, intervention and outcomes. The Cochrane Library Database search strategy in the table below will be adapted for other databases. Furthermore, RCTs will also be obtained from the reference lists of included studies and published systematic reviews of interventions to improve upper limb or hand motor function in individuals with moderate to severe stroke.

Table 1 Search strategy in Cochrane Library Database

|     |                                                                                                                                                                                          |
|-----|------------------------------------------------------------------------------------------------------------------------------------------------------------------------------------------|
| #1  | MeSH descriptor: [Stroke] explode all trees                                                                                                                                              |
| #2  | Stroke:ti OR Cerebrovascular Accident*:ti OR CVA:ti OR Cerebrovascular Event*:ti OR Cerebrovascular Insult*:ti OR Brain:ti Vascular Accident*:ti OR Apoplexy*:ti OR Brain Infraction*:ti |
| #3  | #1 OR #2                                                                                                                                                                                 |
| #4  | MeSH descriptor: [Hand] explode all trees                                                                                                                                                |
| #5  | (Hand* OR Palm* OR Finger* OR Thumb* OR Wrist*):ti,ab,kw                                                                                                                                 |
| #6  | #4 OR #5                                                                                                                                                                                 |
| #7  | MeSH descriptor: [Rehabilitation] explode all trees                                                                                                                                      |
| #8  | MeSH descriptor: [Exercise] explode all trees                                                                                                                                            |
| #9  | MeSH descriptor: [Therapeutics] explode all trees                                                                                                                                        |
| #10 | (Rehab* OR Exercis* OR Therap* OR Treat*):ti,ab,kw                                                                                                                                       |
| #11 | #7 OR #8 OR #9 OR #10                                                                                                                                                                    |
| #12 | #3 AND #6 AND #11 in Trials                                                                                                                                                              |

### Screening of the studies

The reference management software, Endnote (version X9; Thomson Reuters, NY, USA), will be used to help upload, store and select the literature results. For each database, a separate library group will be created to keep all original search results. All separate library group copies will then merge into a new library group and duplicate checking will be carried out in the new library group using a Find Duplicates dialog box in the Endnote. Two independent reviewers (HWW, RA) will screen all the retrieved titles and abstracts according to the previously determined inclusion and exclusion criteria and full text will be screened to further confirm the final selection of the publications. Additional articles might be included by reference list check of the selected studies and relevant published systematic reviews mentioned in search strategy. In case of any disagreements, a third reviewer (JY) will be referred to make a final decision. All reasons for

1  
2  
3 exclusion of any publications will be noted. The PRISMA flow of information through the different  
4 phases of a systematic review will be filled in, to record the whole screening process in detail<sup>94 95</sup>.  
5  
6

### 7 **Data extraction**

8 The two independent reviewers (HWW, RA) will carry out the data extraction following  
9 recommendations from the PRISMA statement<sup>94 95</sup>. Disagrees between the two reviewers will be  
10 solved by a third reviewer (JY) to reach a consensus. The extracted data will include general study  
11 information (authors, year of publication and ethics), characteristics of participants (sample size,  
12 inclusion/ exclusion criteria, random process and allocation, age, gender, type and time since the  
13 onset of the stroke), interventions (type of intervention, dose, duration, frequency, supervision and  
14 comparison/control group), outcome measures (observation time points, hand function assessments,  
15 hand movement kinematic analysis, quality of life changes, possible mental improvement, dropout,  
16 length of follow up, adverse events and conflict of interest). If necessary, the corresponding authors  
17 of the selected publications will be contacted for missing data and further information.  
18  
19  
20  
21  
22

### 23 **Risk of bias**

24 The risk of bias of the included RCTs will be evaluated by the Cochrane Collaboration's tool  
25 (Table 8.5.a in the Cochrane Handbook for Systematic Reviews of Interventions)<sup>97</sup>. The Cochrane  
26 Collaboration's tool is a 6-item checklist, which includes sequence generation, allocation  
27 concealment, blinding, incomplete outcome data, selective outcome reporting and other sources of  
28 bias not issued in other domains mentioned above. For each item in the checklist, the risk of bias  
29 will be categorized as low (meet all criteria), unclear (insufficient detail reported in the publications)  
30 or high risk of bias (meet none of the criteria). Two independent reviewers (HWW, RA) will perform  
31 these judgements of risk of bias and disagreements will be resolved first by discussion and then by  
32 referring to a third reviewer author (JY) as an arbitrator when necessary.  
33  
34  
35  
36

### 37 **Strategy for data synthesis**

38 We will provide a qualitative synthesis, in text and table, to summarize the main results of the  
39 selected publications. A narrative synthesis will be included to demonstrate the findings, structured  
40 around the type of intervention, target population characteristics, intervention content and types of  
41 outcome. We anticipate that there will be limited scope for meta-analysis because of the range of  
42 different outcomes measured and heterogeneity of interventions across the existing trials based on  
43 initial screening.  
44  
45  
46  
47

### 48 **Analyses of subgroups or subsets**

49 We will perform the subgroups analyses if sufficient data are available. These analyses will  
50 involve differences between the stroke phases (i.e. acute/subacute/chronic), the main therapeutic  
51 goal of treatment (i.e. aiming at the recovery of hand function/aiming at the recovery of arm and  
52 hand function), the measurement tools (e.g. activity measures/body function measures), intervention  
53 details (type, duration and delivery of the intervention), participation of patients in trials (active  
54 movement training/passive training) and quality and risk of bias.  
55  
56  
57

### 58 **Quality of evidence**

59 According to the recommendations from the Cochrane Handbook for Systematic Reviews of  
60



Interventions<sup>97</sup>, the Grading of Recommendations Assessment, Development and Evaluation (GRADE) system will be used to assess the body of the evidence for all outcomes<sup>98</sup>. This system involves consideration of within-study risk of bias, consistency, directness of evidence, precision of effects estimates and publication bias. The overall quality of evidence will be adjudicated at four levels: high, moderate, low and very low (table 2).

Table 2 Quality of evidence and definitions

|                  |                                                                                                                                  |
|------------------|----------------------------------------------------------------------------------------------------------------------------------|
| High quality     | Further research is very unlikely to change the confidence in the estimate of effects.                                           |
| Moderate quality | Further research is likely to have an important impact on the confidence in the estimate of effect and may change the estimate   |
| Low quality      | Further research is very likely to have an important impact on the confidence in the effect and is likely to change the estimate |
| Very low quality | Any estimate of the effect is very uncertain                                                                                     |

### Ethics and dissemination

This systematic review does not need ethical approval and informed consent. Findings of this review will be disseminated via peer-reviewed publications and conference presentations.

### DISCUSSION

Rehabilitation of hand motor function after stroke is different from other parts of the body like the lower extremity, trunk and even the proximal part of the upper limb, which recover faster and more completely<sup>99</sup>. The neural basis underlying the hand rehabilitation in moderate to severe stroke patients makes effective restoration of hand motor function extremely challenging, therefore, currently this cohort of stroke survivors are largely ignored for hand function rehabilitation. To date, there is also no systematic review or guideline that focuses extensively on the effectiveness of interventions to improve hand motor function in individuals with moderate to severe stroke. To the best of our knowledge, this is the first systematic review that attempts to sort out the hand rehabilitation approaches and make a comprehensive analysis of the existing evidence to fill in the gaps in this field.

This systematic review has several strengths. First, the preparation of this protocol is consistent with the methodology recommended by the Preferred Reporting Items for Systematic Reviews and Meta-Analyses Protocols and the Cochrane handbook for systematic reviews of interventions. Second, we only include RCTs which have recruited participants with moderate to severe hand function after stroke. This is because publications have provided us with convincing evidence that patients with baseline ability to control wrist and finger extension can achieve improvements in hand function and quality of life after receiving treatment procedures like modified CIMT<sup>12 13</sup>. However, there is no consensus on the effectiveness of intervention methods for stroke patients with more severely damaged hand. Third, more and more clinical trials on this topic have been published in recent decades, and it is time for a systematic review now.

The results of this systematic review will provide a detailed summary of the current progress of evidence for interventions to improve hand motor function in individuals with moderate to severe stroke. Such a review can contribute to not only identifying the gaps thus providing a guidance for further research, but also offering valuable information for therapeutics to help stroke survivors with impaired hand function.

#### Author affiliations

<sup>1</sup>Department of Rehabilitation, Huashan Hospital, Fudan University, No. 12 Middle Wulumuqi Road, Shanghai 200040, China

<sup>2</sup>Northwestern University, Physical Therapy and Human Movement Sciences, 645 N Michigan Avenue, Suite 1100 Chicago IL 60611

**Contributors** JY is the lead and the guarantor of this review. HWW and RA conceptualized the review and drafted the manuscript. HWW and RA developed the search strategy included in the protocol. JJ, LD and SGC revised the protocol critically. All authors read and provided feedback on the draft and approved the final manuscript.

**Funding** This research is funded by National Key R&D Program of China ( Grant No.2018YFC2002300 and 2018YFC2002301 ), the China National Nature Science Young Foundation (Grant No.81401859) and the Science and Technology Commission of Shanghai Municipality (Grant No. 15441901602 and 16441905303).

**Competing interests** None declared.

**Provenance and peer review** Not commissioned; externally peer reviewed

**Data sharing statement** Unpublished data from this study will be available by contacting corresponding author. Unpublished data will be shared.

**Open Access** This is an Open Access article distributed in accordance with the Creative Commons Attribution Non Commercial (CC BY-NC 4.0) license, which permits others to distribute, remix, adapt, build upon this work noncommercially, and license their derivative works on different terms, provided the original work is properly cited and the use is non-commercial. See: <http://creativecommons.org/licenses/by-nc/4.0/>

#### REFERENCES

1. Feigin VL, Krishnamurthi RV, Parmar P, et al. Update on the Global Burden of Ischemic and Hemorrhagic Stroke in 1990-2013: The GBD 2013 Study. *Neuroepidemiology* 2015;45(3):161-76.
2. Mayo NE, Wood-Dauphinee S, Ahmed S, et al. Disablement following stroke. *Disability and rehabilitation* 1999;21(5-6):258-68.
3. Kwakkel G, Kollen BJ, van der Grond J, et al. Probability of regaining dexterity in the flaccid upper limb: impact of severity of paresis and time since onset in acute stroke. *Stroke* 2003;34(9):2181-6.
4. Lee KB, Lim SH, Kim KH, et al. Six-month functional recovery of stroke patients: a multi-time-point study. *International journal of rehabilitation research Internationale Zeitschrift fur Rehabilitationsforschung Revue internationale de recherches de readaptation* 2015;38(2):173-80.
5. Ferraro M, Demaio JH, Krol J, et al. Assessing the motor status score: a scale for the evaluation of upper limb motor outcomes in patients after stroke. *Neurorehabilitation and neural repair* 2002;16(3):283-9.
6. Neumann DA. *Kinesiology of the musculoskeletal system-e-book: foundations for rehabilitation*: Elsevier Health Sciences, 2013.
7. Wolbrecht ET, Rowe JB, Chan V, et al. Finger strength, individuation, and their interaction: Relationship to hand function and corticospinal tract injury after stroke. *Clinical neurophysiology : official journal of the International Federation of Clinical Neurophysiology* 2018;129(4):797-808.
8. Hung CS, Hsieh YW, Wu CY, et al. The Effects of Combination of Robot-Assisted Therapy With Task-Specific or Impairment-Oriented Training on Motor Function and Quality of Life in Chronic Stroke. *PM & R : the journal of injury, function, and rehabilitation* 2016;8(8):721-9.
9. Wolf SL, Blanton S, Baer H, et al. Repetitive task practice: a critical review of constraint-induced movement therapy in stroke. *Neurologist* 2002;8(6):325-38.
10. Wolf SL, Winstein CJ, Miller JP, et al. Effect of constraint-induced movement therapy on upper extremity function 3 to 9 months after stroke: the EXCITE randomized clinical trial. *JAMA* 2006;296(17):2095-104.
11. Taub E, Uswatte G, Elbert T. New treatments in neurorehabilitation founded on basic research. *Nat Rev Neurosci* 2002;3(3):228-36.

12. Kwakkel G, Veerbeek JM, van Wegen EE, et al. Constraint-induced movement therapy after stroke. *Lancet Neurol* 2015;14(2):224-34.
13. Morris DM, Crago JE, DeLuca SC, et al. Constraint-induced movement therapy for motor recovery after stroke. *NeuroRehabilitation* 1997;9(1):29-43.
14. Hlustik P, Solodkin A, Gullapalli RP, et al. Somatotopy in human primary motor and somatosensory hand representations revisited. *Cerebral cortex (New York, NY : 1991)* 2001;11(4):312-21.
15. Hamzei F, Dettmers C, Rijntjes M, et al. The effect of cortico-spinal tract damage on primary sensorimotor cortex activation after rehabilitation therapy. 2008;190(3):329.
16. Johansen-Berg H, Rushworth MF, Bogdanovic MD, et al. The role of ipsilateral premotor cortex in hand movement after stroke. *Proceedings of the National Academy of Sciences of the United States of America* 2002;99(22):14518-23.
17. Yao J, Drogos J, Veltink F, et al. The effect of transcranial direct current stimulation on the expression of the flexor synergy in the paretic arm in chronic stroke is dependent on shoulder abduction loading. *Frontiers in human neuroscience* 2015;9:262.
18. Baker SN, Zaami B, Fisher KM, et al. Pathways mediating functional recovery. *Progress in brain research* 2015;218:389-412.
19. Lawrence DG, Kuypers HG. The functional organization of the motor system in the monkey. I. The effects of bilateral pyramidal lesions. *Brain : a journal of neurology* 1968;91(1):1-14.
20. Wilkins KB, Owen M, Ingo C, et al. Neural Plasticity in Moderate to Severe Chronic Stroke Following a Device-Assisted Task-Specific Arm/Hand Intervention. *Front Neurol* 2017;8:284.
21. Lan Y, Yao J, Dewald JPA. The Impact of Shoulder Abduction Loading on Volitional Hand Opening and Grasping in Chronic Hemiparetic Stroke. *Neurorehabilitation and neural repair* 2017;31(6):521-29.
22. Lang CE, Schieber MH. Reduced muscle selectivity during individuated finger movements in humans after damage to the motor cortex or corticospinal tract. *Journal of neurophysiology* 2004;91(4):1722-33.
23. Camona C, Wilkins KB, Drogos J, et al. Improving Hand Function of Severely Impaired Chronic Hemiparetic Stroke Individuals Using Task-Specific Training With the ReIn-Hand System: A Case Series. *Front Neurol* 2018;9:923.
24. Hayward K, Barker R, Brauer S. Interventions to promote upper limb recovery in stroke survivors with severe paresis: a systematic review. *Disability and rehabilitation* 2010;32(24):1973-86.
25. Corbetta D, Sirtori V, Castellini G, et al. Constraint-induced movement therapy for upper extremities in people with stroke. *The Cochrane database of systematic reviews* 2015(10):Cd004433.
26. Etoom M, Hawamdeh M, Hawamdeh Z, et al. Constraint-induced movement therapy as a rehabilitation intervention for upper extremity in stroke patients: systematic review and meta-analysis. *International journal of rehabilitation research Internationale Zeitschrift für Rehabilitationsforschung Revue internationale de recherches de readaptation* 2016;39(3):197-210.
27. McIntyre A, Viana R, Janzen S, et al. Systematic review and meta-analysis of constraint-induced movement therapy in the hemiparetic upper extremity more than six months post stroke. *Topics in stroke rehabilitation* 2012;19(6):499-513.
28. Shi YX, Tian JH, Yang KH, et al. Modified constraint-induced movement therapy versus traditional rehabilitation in patients with upper-extremity dysfunction after stroke: a systematic review and meta-analysis. *Archives of physical medicine and rehabilitation* 2011;92(6):972-82.
29. Nijland R, Kwakkel G, Bakers J, et al. Constraint-induced movement therapy for the upper paretic limb in acute or sub-acute stroke: a systematic review. *International journal of stroke : official journal of the International Stroke Society* 2011;6(5):425-33.
30. Veerbeek JM, Langbroek-Amersfoort AC, van Wegen EE, et al. Effects of Robot-Assisted Therapy for the Upper Limb After Stroke. *Neurorehabilitation and neural repair* 2017;31(2):107-21.
31. Zhang C, Li-Tsang CW, Au RK. Robotic approaches for the rehabilitation of upper limb recovery after stroke: a systematic review and meta-analysis. *International journal of rehabilitation research Internationale Zeitschrift für Rehabilitationsforschung Revue internationale de recherches de readaptation* 2017;40(1):19-28.
32. Bertani R, Melegari C, De Cola MC, et al. Effects of robot-assisted upper limb rehabilitation in stroke patients: a systematic review with meta-analysis. *Neurological sciences : official journal of the Italian Neurological Society and of the Italian Society of Clinical Neurophysiology* 2017;38(9):1561-69.
33. Babaiasl M, Mahdioun SH, Jaryani P, et al. A review of technological and clinical aspects of robot-aided rehabilitation of

- 1  
2  
3 upper-extremity after stroke. *Disability and rehabilitation Assistive technology* 2016;11(4):263-80.
- 4 34. Prange GB, Jannink MJ, Groothuis-Oudshoorn CG, et al. Systematic review of the effect of robot-aided therapy on recovery  
5 of the hemiparetic arm after stroke. *Journal of rehabilitation research and development* 2006;43(2):171-84.
- 6 35. Mehrholz J, Platz T, Kugler J, et al. Electromechanical and robot-assisted arm training for improving arm function and activities  
7 of daily living after stroke. *The Cochrane database of systematic reviews* 2008(4):Cd006876.
- 8 36. Coupar F, Pollock A, van Wijck F, et al. Simultaneous bilateral training for improving arm function after stroke. *The Cochrane*  
9 *database of systematic reviews* 2010(4):Cd006432.
- 10 37. Latimer CP, Keeling J, Lin B, et al. The impact of bilateral therapy on upper limb function after chronic stroke: a systematic  
11 review. *Disability and rehabilitation* 2010;32(15):1221-31.
- 12 38. Timmermans AA, Spooren AI, Kingma H, et al. Influence of task-oriented training content on skilled arm-hand performance  
13 in stroke: a systematic review. *Neurorehabilitation and neural repair* 2010;24(9):858-70.
- 14 39. van der Lee JH, Snels IA, Beckerman H, et al. Exercise therapy for arm function in stroke patients: a systematic review of  
15 randomized controlled trials. *Clinical rehabilitation* 2001;15(1):20-31.
- 16 40. Eraifej J, Clark W, France B, et al. Effectiveness of upper limb functional electrical stimulation after stroke for the improvement  
17 of activities of daily living and motor function: a systematic review and meta-analysis. *Syst Rev* 2017;6(1):40.
- 18 41. Vafadar AK, Cote JN, Archambault PS. Effectiveness of functional electrical stimulation in improving clinical outcomes in the  
19 upper arm following stroke: a systematic review and meta-analysis. *BioMed research international* 2015;2015:729768.
- 20 42. Tyson SF, Kent RM. The effect of upper limb orthotics after stroke: a systematic review. *NeuroRehabilitation* 2011;28(1):29-  
21 36.
- 22 43. Lannin NA, Novak I, Cusick A. A systematic review of upper extremity casting for children and adults with central nervous  
23 system motor disorders. *Clinical rehabilitation* 2007;21(11):963-76.
- 24 44. Barclay-Goddard RE, Stevenson TJ, Poluha W, et al. Mental practice for treating upper extremity deficits in individuals with  
25 hemiparesis after stroke. *The Cochrane database of systematic reviews* 2011(5):Cd005950.
- 26 45. Guerra ZF, Lucchetti ALG, Lucchetti G. Motor Imagery Training After Stroke: A Systematic Review and Meta-analysis of  
27 Randomized Controlled Trials. *Journal of neurologic physical therapy : JNPT* 2017;41(4):205-14.
- 28 46. Ezendam D, Bongers RM, Jannink MJ. Systematic review of the effectiveness of mirror therapy in upper extremity function.  
29 *Disability and rehabilitation* 2009;31(26):2135-49.
- 30 47. Perez-Cruzado D, Merchan-Baeza JA, Gonzalez-Sanchez M, et al. Systematic review of mirror therapy compared with  
31 conventional rehabilitation in upper extremity function in stroke survivors. *Australian occupational therapy journal* 2017;64(2):91-  
32 112.
- 33 48. Thieme H, Morkisch N, Mehrholz J, et al. Mirror therapy for improving motor function after stroke. *The Cochrane database of*  
34 *systematic reviews* 2018;7:Cd008449.
- 35 49. Elsner B, Kugler J, Pohl M, et al. Transcranial direct current stimulation (tDCS) for improving function and activities of daily  
36 living in patients after stroke. *The Cochrane database of systematic reviews* 2013(11):Cd009645.
- 37 50. Kandel M, Beis JM, Le Chapelain L, et al. Non-invasive cerebral stimulation for the upper limb rehabilitation after stroke: a  
38 review. *Ann Phys Rehabil Med* 2012;55(9-10):657-80.
- 39 51. Graef P, Dadalt MLR, Rodrigues D, et al. Transcranial magnetic stimulation combined with upper-limb training for improving  
40 function after stroke: A systematic review and meta-analysis. *Journal of the neurological sciences* 2016;369:149-58.
- 41 52. Tedesco Triccas L, Burridge JH, Hughes AM, et al. Multiple sessions of transcranial direct current stimulation and upper  
42 extremity rehabilitation in stroke: A review and meta-analysis. *Clinical neurophysiology : official journal of the International*  
43 *Federation of Clinical Neurophysiology* 2016;127(1):946-55.
- 44 53. Monge-Pereira E, Ibanez-Pereda J, Alguacil-Diego IM, et al. Use of Electroencephalography Brain-Computer Interface  
45 Systems as a Rehabilitative Approach for Upper Limb Function After a Stroke: A Systematic Review. *PM & R : the journal of*  
46 *injury, function, and rehabilitation* 2017;9(9):918-32.
- 47 54. Carvalho R, Dias N, Cerqueira JJ. Brain-machine interface of upper limb recovery in stroke patients rehabilitation: A systematic  
48 review. *Physiotherapy research international : the journal for researchers and clinicians in physical therapy* 2019:e1764.
- 49  
50  
51  
52  
53  
54  
55  
56  
57  
58  
59  
60

- 1
- 2
- 3
- 4 55. Coupar F, Pollock A, Legg LA, et al. Home-based therapy programmes for upper limb functional recovery following stroke. *The Cochrane database of systematic reviews* 2012(5):Cd006755.
- 5
- 6 56. Pollock A, Farmer SE, Brady MC, et al. Interventions for improving upper limb function after stroke. *The Cochrane database of systematic reviews* 2014(11):Cd010820.
- 7
- 8 57. Urton ML, Kohia M, Davis J, et al. Systematic literature review of treatment interventions for upper extremity hemiparesis following stroke. *Occupational therapy international* 2007;14(1):11-27.
- 9
- 10 58. Platz T. [Evidence-based arm rehabilitation--a systematic review of the literature]. *Der Nervenarzt* 2003;74(10):841-9.
- 11
- 12 59. Hatem SM, Saussez G, Della Faille M, et al. Rehabilitation of Motor Function after Stroke: A Multiple Systematic Review Focused on Techniques to Stimulate Upper Extremity Recovery. *Frontiers in human neuroscience* 2016;10:442.
- 13
- 14 60. Pelton T, van Vliet P, Hollands K. Interventions for improving coordination of reach to grasp following stroke: a systematic review. *International journal of evidence-based healthcare* 2012;10(2):89-102.
- 15
- 16 61. Doyle S, Bennett S, Fasoli SE, et al. Interventions for sensory impairment in the upper limb after stroke. *The Cochrane database of systematic reviews* 2010(6):Cd006331.
- 17
- 18 62. Dong Y, Wu T, Hu X, et al. Efficacy and safety of botulinum toxin type A for upper limb spasticity after stroke or traumatic brain injury: a systematic review with meta-analysis and trial sequential analysis. *European journal of physical and rehabilitation medicine* 2017;53(2):256-67.
- 19
- 20 63. Salazar AP, Pinto C, Ruschel Mossi JV, et al. Effectiveness of static stretching positioning on post-stroke upper-limb spasticity and mobility: Systematic review with meta-analysis. *Ann Phys Rehabil Med* 2018.
- 21
- 22 64. Pulman J, Buckley E. Assessing the efficacy of different upper limb hemiparesis interventions on improving health-related quality of life in stroke patients: a systematic review. *Topics in stroke rehabilitation* 2013;20(2):171-88.
- 23
- 24 65. Arya KN, Pandian S, Puri V. Rehabilitation methods for reducing shoulder subluxation in post-stroke hemiparesis: a systematic review. *Topics in stroke rehabilitation* 2018;25(1):68-81.
- 25
- 26 66. Lee SH, Lim SM. Acupuncture for Poststroke Shoulder Pain: A Systematic Review and Meta-Analysis. *Evidence-based complementary and alternative medicine : eCAM* 2016;2016:3549878.
- 27
- 28 67. Nadler M, Pauls M. Shoulder orthoses for the prevention and reduction of hemiplegic shoulder pain and subluxation: systematic review. *Clinical rehabilitation* 2017;31(4):444-53.
- 29
- 30 68. Wattoh KA, McDonnell MN, Hillier SL. Rehabilitation Interventions for Upper Limb Function in the First Four Weeks Following Stroke: A Systematic Review and Meta-Analysis of the Evidence. *Archives of physical medicine and rehabilitation* 2018;99(2):367-82.
- 31
- 32 69. Hayward KS, Brauer SG. Dose of arm activity training during acute and subacute rehabilitation post stroke: a systematic review of the literature. *Clinical rehabilitation* 2015;29(12):1234-43.
- 33
- 34 70. Ashford S, Slade M, Malaprade F, et al. Evaluation of functional outcome measures for the hemiparetic upper limb: a systematic review. *Journal of rehabilitation medicine* 2008;40(10):787-95.
- 35
- 36 71. Beaulieu LD, Milot MH. Changes in transcranial magnetic stimulation outcome measures in response to upper-limb physical training in stroke: A systematic review of randomized controlled trials. *Ann Phys Rehabil Med* 2018;61(4):224-34.
- 37
- 38 72. Alt Murphy M, Resteghini C, Feys P, et al. An overview of systematic reviews on upper extremity outcome measures after stroke. *BMC neurology* 2015;15:29.
- 39
- 40 73. Sivan M, O'Connor RJ, Makower S, et al. Systematic review of outcome measures used in the evaluation of robot-assisted upper limb exercise in stroke. *Journal of rehabilitation medicine* 2011;43(3):181-9.
- 41
- 42 74. Santisteban L, Teremetz M, Bleton JP, et al. Upper Limb Outcome Measures Used in Stroke Rehabilitation Studies: A Systematic Literature Review. *PLoS one* 2016;11(5):e0154792.
- 43
- 44 75. Velstra IM, Ballert CS, Cieza A. A systematic literature review of outcome measures for upper extremity function using the international classification of functioning, disability, and health as reference. *PM & R : the journal of injury, function, and rehabilitation* 2011;3(9):846-60.
- 45
- 46 76. Kumar P, Kathuria P, Nair P, et al. Prediction of Upper Limb Motor Recovery after Subacute Ischemic Stroke Using Diffusion Tensor Imaging: A Systematic Review and Meta-Analysis. *J Stroke* 2016;18(1):50-9.
- 47
- 48
- 49
- 50
- 51
- 52
- 53
- 54
- 55
- 56
- 57
- 58
- 59
- 60

- 1  
2  
3  
4  
5  
6  
7  
8  
9  
10  
11  
12  
13  
14  
15  
16  
17  
18  
19  
20  
21  
22  
23  
24  
25  
26  
27  
28  
29  
30  
31  
32  
33  
34  
35  
36  
37  
38  
39  
40  
41  
42  
43  
44  
45  
46  
47  
48  
49  
50  
51  
52  
53  
54  
55  
56  
57  
58  
59  
60
77. Tedesco Triccas L, Kennedy N, Smith T, et al. Predictors of upper limb spasticity after stroke? A systematic review and meta-analysis. *Physiotherapy* 2019.
78. Ostolaza M, Abudarham J, Dilascio S, et al. [Hand fine motor skills and use of both hand and arm in subjects after a stroke: a systematic review]. *Revista de neurologia* 2017;64(7):289-98.
79. Grant VM, Gibson A, Shields N. Somatosensory stimulation to improve hand and upper limb function after stroke-a systematic review with meta-analyses. *Topics in stroke rehabilitation* 2018;25(2):150-60.
80. Yue Z, Zhang X, Wang J. Hand Rehabilitation Robotics on Poststroke Motor Recovery. *Behavioural neurology* 2017;2017:3908135.
81. Meilink A, Hemmen B, Seelen HA, et al. Impact of EMG-triggered neuromuscular stimulation of the wrist and finger extensors of the paretic hand after stroke: a systematic review of the literature. *Clinical rehabilitation* 2008;22(4):291-305.
82. McConnell AC, Moiola RC, Brasil FL, et al. Robotic devices and brain-machine interfaces for hand rehabilitation post-stroke. *Journal of rehabilitation medicine* 2017;49(6):449-60.
83. O'Brien AT, Bertolucci F, Torrealba-Acosta G, et al. Non-invasive brain stimulation for fine motor improvement after stroke: a meta-analysis. *European journal of neurology* 2018;25(8):1017-26.
84. Schick T, Schlake HP, Kallusky J, et al. Synergy effects of combined multichannel EMG-triggered electrical stimulation and mirror therapy in subacute stroke patients with severe or very severe arm/hand paresis. *Restorative neurology and neuroscience* 2017;35(3):319-32.
85. Rabadi MH, Aston CE. Effect of Transcranial Direct Current Stimulation on Severely Affected Arm-Hand Motor Function in Patients After an Acute Ischemic Stroke: A Pilot Randomized Control Trial. *American journal of physical medicine & rehabilitation* 2017;96(10 Suppl 1):S178-s84.
86. Takeuchi N, Tada T, Toshima M, et al. Inhibition of the unaffected motor cortex by 1 Hz repetitive transcranial magnetic stimulation enhances motor performance and training effect of the paretic hand in patients with chronic stroke. *Journal of Rehabilitation Medicine (Stiftelsen Rehabiliteringsinformation)* 2008;40(4):298-303.
87. Michielsen ME, Selles RW, van der Geest JN, et al. Motor recovery and cortical reorganization after mirror therapy in chronic stroke patients: a phase II randomized controlled trial. *Neurorehabilitation and neural repair* 2011;25(3):223-33.
88. Winstein CJ, Stein J, Arena R, et al. Guidelines for Adult Stroke Rehabilitation and Recovery: A Guideline for Healthcare Professionals From the American Heart Association/American Stroke Association. *Stroke* 2016;47(6):e98-e169.
89. Hebert D, Lindsay MP, McIntyre A, et al. Canadian stroke best practice recommendations: Stroke rehabilitation practice guidelines, update 2015. *International journal of stroke : official journal of the International Stroke Society* 2016;11(4):459-84.
90. Foundation S. *Clinical guidelines for stroke management 2017*: Stroke Foundation Melbourne, Victoria, Australia, 2017.
91. National Clinical Guideline C. National Institute for Health and Care Excellence: *Clinical Guidelines. Stroke Rehabilitation: Long Term Rehabilitation After Stroke*. London: Royal College of Physicians (UK) National Clinical Guideline Centre., 2013.
92. Moher D, Shamseer L, Clarke M, et al. Preferred reporting items for systematic review and meta-analysis protocols (PRISMA-P) 2015 statement. *Syst Rev* 2015;4:1.
93. Shamseer L, Moher D, Clarke M, et al. Preferred reporting items for systematic review and meta-analysis protocols (PRISMA-P) 2015: elaboration and explanation. *BMJ (Clinical research ed)* 2015;350:g7647.
94. Liberati A, Altman DG, Tetzlaff J, et al. The PRISMA statement for reporting systematic reviews and meta-analyses of studies that evaluate health care interventions: explanation and elaboration. *Journal of clinical epidemiology* 2009;62(10):e1-34.
95. Moher D, Liberati A, Tetzlaff J, et al. Preferred reporting items for systematic reviews and meta-analyses: the PRISMA statement. *PLoS medicine* 2009;6(7):e1000097-e97.
96. Hatano S. Experience from a multicentre stroke register: a preliminary report. *Bulletin of the World Health Organization* 1976;54(5):541-53.
97. Higgins JP, Green S. *Cochrane handbook for systematic reviews of interventions*. 2008.
98. Guyatt GH, Oxman AD, Vist GE, et al. GRADE: an emerging consensus on rating quality of evidence and strength of recommendations. *BMJ (Clinical research ed)* 2008;336(7650):924-6.

99. Duruöz MT. Hand function: a practical guide to assessment: Springer, 2014:107-108.

For peer review only

# BMJ Open

## Effectiveness of interventions to improve hand motor function in individuals with moderate to severe stroke: a systematic review protocol

|                                 |                                                                                                                                                                                                                                                                                                                                                                         |
|---------------------------------|-------------------------------------------------------------------------------------------------------------------------------------------------------------------------------------------------------------------------------------------------------------------------------------------------------------------------------------------------------------------------|
| Journal:                        | <i>BMJ Open</i>                                                                                                                                                                                                                                                                                                                                                         |
| Manuscript ID                   | bmjopen-2019-032413.R1                                                                                                                                                                                                                                                                                                                                                  |
| Article Type:                   | Protocol                                                                                                                                                                                                                                                                                                                                                                |
| Date Submitted by the Author:   | 13-Aug-2019                                                                                                                                                                                                                                                                                                                                                             |
| Complete List of Authors:       | Wang, Hewei; Huashan Hospital Fudan University, Arceo, Ray; Northwestern University, Physical Therapy and Human Movement Sciences<br>Chen, Shugeng; Huashan Hospital Fudan University<br>Ding, Li; Huashan Hospital Fudan University<br>Jia, Jie; Huashan Hospital Fudan University,<br>Yao, Jun; Northwestern University, Physical Therapy and Human Movement Sciences |
| <b>Primary Subject Heading</b>: | Rehabilitation medicine                                                                                                                                                                                                                                                                                                                                                 |
| Secondary Subject Heading:      | Evidence based practice                                                                                                                                                                                                                                                                                                                                                 |
| Keywords:                       | Review Protocol, Hand, Motor Function, Rehabilitation, Stroke < NEUROLOGY                                                                                                                                                                                                                                                                                               |
|                                 |                                                                                                                                                                                                                                                                                                                                                                         |

SCHOLARONE™  
Manuscripts



1  
2  
3 BMJ-Open Manuscript  
4  
5

6 **Effectiveness of interventions to improve hand motor function in individuals with**  
7 **moderate to severe stroke: a systematic review protocol**  
8

9 Hewei Wang<sup>1</sup>, Ray Arceo<sup>2</sup>, Shugeng Chen<sup>1</sup>, Li Ding<sup>1</sup>, Jie Jia<sup>1\*</sup>, Jun Yao<sup>2\*</sup>  
10  
11

12 <sup>1</sup>Department of Rehabilitation, Huashan Hospital, Fudan University, No. 12 Middle Wulumuqi  
13 Road, Shanghai 200040, China

14 <sup>2</sup>Northwestern University, Physical Therapy and Human Movement Sciences, 645 N Michigan  
15 Avenue, Suite 1100 Chicago IL 60611  
16  
17

18  
19 **\*Corresponding authors:** Dr Jun Yao, Northwestern University, Physical Therapy and Human  
20 Movement Sciences, 645 N Michigan Avenue, Suite 1100 Chicago IL 60611, Tel: +1-312-908-  
21 9060, Fax:312-908-0741, e-mail: j-yao4@northwestern.edu;  
22

23 Dr Jie Jia, Department of Rehabilitation, Huashan Hospital, Fudan University, No. 12 Middle  
24 Wulumuqi Road, Shanghai 200040, China, Tel: +86 021-52887820, e-mail: shannonjj@126.com.  
25

26  
27 **Keywords**

28 review protocol, hand, motor function, rehabilitation, stroke  
29

30  
31 **Word Count**

32 3613 words (excluding title page, references, figures and tables)  
33  
34  
35  
36  
37  
38  
39  
40  
41  
42  
43  
44  
45  
46  
47  
48  
49  
50  
51  
52  
53  
54  
55  
56  
57  
58  
59  
60

## Effectiveness of interventions to improve hand motor function in individuals with moderate to severe stroke: a systematic review protocol

Hewei Wang<sup>1</sup>, Ray Arceo<sup>2</sup>, Shugeng Chen<sup>1</sup>, Li Ding<sup>1</sup>, Jie Jia<sup>1\*</sup>, Jun Yao<sup>2\*</sup>

### ABSTRACT

**Introduction:** The human hand is extremely involved in our daily lives. However, the rehabilitation of hand function after stroke can be rather difficult due to the complexity of hand structure and function, as well as neural basis that supports hand function. Specifically, in individuals with moderate to severe impairment following a stroke, previous evidence for effective treatments that recover hand function in this population is limited, and thus has never been reviewed. With the progress of rehabilitation science and tool development, results from more and more clinical trials are now available, thereby justifying conducting a systematic review.

**Methods and analysis:** This systematic review protocol is consistent with the methodology recommended by the Preferred Reporting Items for Systematic Reviews and Meta-Analyses Protocols and the Cochrane handbook for systematic reviews of interventions. Electronic searches will be carried out in the PubMed, CINAHL, Physiotherapy Evidence Database (PEDro) and Cochrane Library databases, along with manual searches in the reference lists from included studies and published systematic reviews. The date range parameters used in searching all databases is between January 1999 and January 2019. Randomized controlled trials (RCTs) published in English, with the primary outcome focusing on hand motor function, will be included. Two reviewers will screen all retrieved titles, abstracts and full texts, perform the evaluation of the risk bias and extract all data independently. The risk of bias of the included RCTs will be evaluated by the Cochrane Collaboration's tool. A qualitative synthesis will be provided in text and table, to summarize the main results of the selected publications. A meta-analysis will be considered if there is sufficient homogeneity across outcomes. The quality of the included publications will be evaluated by the Grading of Recommendations Assessment, Development and Evaluation (GRADE) system from the Cochrane Handbook for Systematic Reviews of Interventions.

**Ethics and dissemination:** No ethical approval is needed, and the results of this review will be disseminated via peer-reviewed publications and conference presentations.

**Trial registration number:** The protocol has been registered on the International Prospective Register of Systematic Reviews (PROSPERO) on 10 April 2019 (registration number: CRD42019128285).

### Strengths of this study

- To the best of our knowledge, this is the first systematic review for the effectiveness of interventions to improve hand motor function in individuals with moderate to severe stroke.
- The results of this systematic review will provide a detailed summary of the current progress of evidence for interventions to improve hand motor function, which will contribute to offering valuable information for therapists to help stroke survivors with moderate to severe impairment and identifying the gaps in the literature for further research.

### Limitations of this study

- We anticipate that a limited meta-analysis is likely to be conducted because there may be significant heterogeneity owing to wide range of outcome measures, types of intervention and duration and frequency of training.
- There is always a possibility that the review does not identify all evidence or limitations relevant to the research question, such as the introduction of language bias due to the selection

1  
2  
3  
4  
5  
6  
7  
8  
9  
10  
11  
12  
13  
14  
15  
16  
17  
18  
19  
20  
21  
22  
23  
24  
25  
26  
27  
28  
29  
30  
31  
32  
33  
34  
35  
36  
37  
38  
39  
40  
41  
42  
43  
44  
45  
46  
47  
48  
49  
50  
51  
52  
53  
54  
55  
56  
57  
58  
59  
60

of studies published only in English.

For peer review only

## INTRODUCTION

Stroke is one of the main causes of long-term disabilities among adults<sup>1</sup>. Up to 85% of stroke survivors have hemiparesis that affects the upper extremity on one side<sup>2</sup>, and less than half of them can regain proper arm function 6 months after stroke<sup>3 4</sup>. Generally, hemiparesis impacts the movement function of the hand and wrist more than shoulder and elbow<sup>3 5</sup>. As we know, hand movement plays a core role in upper limb function because of its indispensable and sophisticated function in human daily lives<sup>6</sup>. Many vital activities of daily living, such as using a fork, buttoning a shirt, and opening a door handle, require various hand functions<sup>7</sup>. The losses in hand function can seriously affect patients' functional independence and quality of life<sup>8</sup>.

Currently, for mildly impaired stroke survivors (about 20-25%)<sup>9</sup>, constraint-induced movement therapy (CIMT) has been reported to produce significantly greater gains in hand/arm function compared to conventional therapy<sup>10 11</sup>. However, for stroke survivors who have moderate to severe impairment and do not meet the inclusion criteria of CIMT<sup>12 13</sup>, intervention options for hand motor function recovery are limited. The complexity of hand structure and function together with the neural basis that supports hand function might contribute to the great difficulty of hand function rehabilitation after stroke. Enormous biomechanical complexity makes the hand extensively represented in a large region of the motor cortex of the brain<sup>14</sup>, which suggests that fine control of hand movement depends heavily on an intact corticospinal tract. When the ipsilesional corticofugal tract is seriously damaged due to stroke, contralesional motor-related cortical recruitment becomes the main neural compensatory model for these moderate to severe stroke patients, according to previous studies<sup>15</sup>. That the inhibition of contralesional motor cortex using transcranial magnetic stimulation<sup>16</sup> or tDCS<sup>17</sup> can lead to more disrupted performance of a simple motor task in patients with poorer motor outcome serves as evidence to support such opinion. The contralesional cortical recruitment may rely on contralesional corticobulbospinal tract such as the corticoreticulospinal tract to control the affected upper limb<sup>18</sup>. However, the compensatory corticoreticulospinal tract branches at multiple segments in spinal cord, and innervates proximal muscles more than distal ones, and prefers the flexors but lacks comparable resolution and innervation to hand and finger extensor muscles<sup>19 20</sup>. The aforementioned features result in the abnormal involuntary coupling between shoulder abduction and wrist/finger flexion, which is also known as the "flexion synergy", as well as muscle weakness especially at extensors of distal joints, thus further constrains functional hand movements especially hand opening<sup>21 22</sup>. In short, it seems that extension at distal joints, like hand opening, depends more on the function of corticospinal track, primarily projected from the lesioned hemisphere, and lacks compensatory neural system to provide 'backup' driving. This neural basis makes effective restoration of hand function in moderate to severe stroke patients become extremely challenging. Furthermore, the resulting 'none-use-decay' can cause further decrease of the hand function. Although full of challenges, some of the research findings demonstrate that hand function recovery in this population is still feasible, with evidence showing both feasibility in intervention-induced changes in behavior<sup>23 24</sup> and neural plasticity measures<sup>20</sup>. We therefore focus on hand function recovery in the group of stroke survivors with moderate to severe impairment in this systematic review.

According to our knowledge of the literature, ample summary of the efficacy of various interventions for upper limb function rehabilitation in stroke patients can be found in published systematic reviews. Most of these reviews evaluate the efficacy of a single category of therapeutic technique, such as CIMT<sup>25-29</sup>, robot-assisted therapy<sup>30-35</sup>, bilateral training<sup>36 37</sup>, task-oriented training<sup>38</sup>, exercise therapy<sup>39</sup>, functional electrical stimulation(FES)<sup>40 41</sup>, orthotics<sup>42 43</sup>, mental practice<sup>44 45</sup>, mirror therapy<sup>46 47</sup>, action observation<sup>48</sup>, non-invasive cerebral stimulation<sup>49-52</sup>, brain-

1  
2  
3 computer interface<sup>53 54</sup>, virtual reality<sup>42</sup>, home-based therapy programmes<sup>55</sup>, etc. There are also  
4 some comprehensive systematic reviews on general function treatment of upper limb after stroke<sup>56-</sup>  
5 <sup>58</sup> or other specific problems, such as motor dysfunction<sup>59 60</sup>, sensory impairment<sup>61</sup>, spasticity<sup>62 63</sup>,  
6 decreased quality of life <sup>64</sup>, and shoulder pain and subluxation<sup>65-67</sup>. In addition, other important  
7 issues of upper limb rehabilitation after stroke, like timing of intervention<sup>68</sup>, dose of training<sup>69</sup>,  
8 effects of severity on motor recovery<sup>24</sup>, outcome measures<sup>70-75</sup> and predictors of functional  
9 restoration<sup>76 77</sup> were systematically reviewed as well. However, much less attention has been paid  
10 to the systematic review of hand function rehabilitation after moderate to severe stroke<sup>78-83</sup>.  
11 Fortunately, with growing attention to this research field in recent decades, an increased number of  
12 clinical trials that focus on moderate to severe stroke patients is now available, involving various  
13 intervention methods, like EMG-triggered electrical stimulation<sup>84</sup>, transcranial direct current  
14 stimulation<sup>85</sup>, robot-assisted movement training, repetitive transcranial magnetic stimulation<sup>86</sup>, and  
15 mirror therapy<sup>87</sup>. Although with relatively small sample sizes, a review of these reported works will  
16 provide insight for the future direction along this line of research and thus may further impact future  
17 clinical practice for this large population.

18  
19 Comprehensive overview of hand motor function rehabilitation in individuals with moderate  
20 to severe stroke has long been neglected not only in systematic reviews but also in the main  
21 guidelines for stroke rehabilitation. In the most recent *Guidelines for Adult Stroke Rehabilitation*  
22 *and Recovery* released by the American Heart Association and the American Stroke Association in  
23 2016, we can only locate recommendations for the treatment of upper extremity activity but can  
24 hardly find any evidence-based suggestions for hand function training<sup>88</sup>. The 2015 update of the  
25 *Canadian Stroke Best Practice Recommendations: Stroke Rehabilitation Practice Guidelines* has  
26 provided a series of recommendations on the management of upper extremity following stroke,  
27 including the restoration of sensorimotor function, and relief of spasticity and pain. Regarding the  
28 hand function rehabilitation after stroke, limited recommendations are scattered among evidence for  
29 other forms of upper extremity interventions, such as FES and CIMT for hand motor function,  
30 botulinum toxin for hand spasticity and range of motion, and exercise and massage for hand edema<sup>89</sup>.  
31 Similar problems can be found in stroke rehabilitation guidelines in UK and Australia, which mainly  
32 provide recommendations on upper extremity management while lacking a detailed description of  
33 the current evidence on hand function recovery<sup>90 91</sup>. The absence of systematic evidence in  
34 guidelines for hand rehabilitation following stroke greatly increases the difficulty of clinical work.

35  
36 In short, a standardized systematic review on the effectiveness of interventions is warranted to  
37 improve hand motor function in individuals with moderate to severe stroke. Therefore, the aim of  
38 this review is to provide an overview of the following:

- 39 1. to identify which interventions that have been employed to increase hand function in individuals  
40 with moderate to severe stroke;
- 41 2. to verify the effectiveness of these interventions;
- 42 3. to identify the gaps in the literature.

## 43 44 45 46 47 48 49 50 51 52 53 54 **METHODS AND ANALYSES**

### 55 **Study design**

56 The review protocol was written and reported following the Preferred Reporting Items for  
57 Systematic Reviews and Meta-Analyses Protocols (PRISMA-P) (see the PRISMA checklist in  
58 *supplementary table 1*)<sup>92 93</sup>. For the results of this systematic review, we will publish it following

the Preferred Reporting Items for Systematic Review and Meta-Analysis (PRISMA) statement<sup>94 95</sup>.

## Eligibility criteria

### Types of study

We will include all randomized controlled trials published in English that investigated the efficacy of rehabilitation interventions to improve hand motor function in individuals with moderate to severe stroke. The random allocation process should be performed in a standard way. Quasi-RCTs or trials without control group such as case series and case reports will be excluded. Preliminary and pilot studies, abstracts published in congress and conferences will also be excluded.

### Participants

We will include all RCTs which have recruited adult patients ( $\geq 18$  years of age) with first or recurrent stroke. Stroke is defined as ‘a clinical syndrome consisting of rapidly developing clinical signs of focal (or global in case of coma) disturbance of cerebral function lasting more than 24 hours or leading to death with no apparent cause other than a vascular origin’ by World Health Organization<sup>96</sup>. The diagnosis of stroke should be confirmed by CT or MRI. The participants in all trials should be assessed as moderate to severe unilateral hand dysfunction as indicated by hand functional assessments such as the Fugl-Meyer Upper Extremity Scale ( $< 45$ ) and Chedoke-McMaster Stroke Assessment ( $\leq$  stage 4)<sup>97 98</sup>. Patients with subarachnoid hemorrhage or subdural hematoma will be excluded. Studies with participants with transient ischemic attack will be excluded since all neurological symptoms would disappear.

### Types of interventions

We will select all trials assessing interventions that at least have one of the treatment goals targeting the regaining of post-hand hand function in individuals with moderate to severe stroke. These interventions should be compared with a control intervention (e.g. no treatment, standard care, conventional training or the same intervention method with different parameters). Trials focusing only on the training of elbow and shoulder will be excluded. The interventions here encompass many different, individual interventions, such as FES, mirror therapy, robot training, CIMT, brain-computer interface, repetitive transcranial magnetic stimulation, etc. Interventions can either be one-to-one or in group setting, hospital-based or home-based (under the supervision of professional), supervised by therapists or self-training. No limits will be placed on the timing, frequency and duration of interventions.

### Type of outcome measures

The primary outcomes of this systematic review will focus on changes in patients’ hand function using various assessments from baseline to the last available follow-up. The assessments can be divided into two groups<sup>72 74</sup>: body functions measures (targeting impairments of hand function, such as Fugl-Meyer Assessment hand part, Chedoke-McMaster Stroke Assessment, Motricity Index etc.) and activity measures (assessing limitations of activities, such as Action Research Arm Test, Box and Block Test, Wolf Motor Function Test, etc.).

Secondary outcome measures will include kinematic analysis of hand movement, possible improvements of quality of life, and mental health improvements related to the hand motor function recovery. The adverse events associated with interventions and adherence to treatment will also be

considered.

### Search strategy for the identification of relevant studies

Electronic searches will be performed for potentially eligible RCTs in the PubMed, CINAHL, Physiotherapy Evidence Database (PEDro) and Cochrane Library databases with restriction in articles with full texts in English. The date range parameters used in all databases will be between January 1999 and January 2019. Searches will combine terms from medical subject headings (MeSH) and keywords in title, abstract and text for the population, intervention and outcomes. The Cochrane Library Database search strategy in the table below (table 1) will be adapted for other databases. Furthermore, RCTs will also be obtained from the reference lists of included studies and published systematic reviews of interventions to improve upper limb or hand motor function in individuals with moderate to severe stroke.

Table 1 Search strategy in Cochrane Library Database

|     |                                                                                                                                                                                                                                                                                                                                                                                                                                                                                                                                 |
|-----|---------------------------------------------------------------------------------------------------------------------------------------------------------------------------------------------------------------------------------------------------------------------------------------------------------------------------------------------------------------------------------------------------------------------------------------------------------------------------------------------------------------------------------|
| #1  | MeSH descriptor: [Stroke] explode all trees                                                                                                                                                                                                                                                                                                                                                                                                                                                                                     |
| #2  | Stroke:ti OR Cerebrovascular Accident*:ti OR CVA:ti OR Cerebrovascular Event*:ti OR Cerebrovascular Insult*:ti OR Brain:ti Vascular Accident*:ti OR Apoplexy*:ti OR Brain Infraction*:ti                                                                                                                                                                                                                                                                                                                                        |
| #3  | #1 OR #2                                                                                                                                                                                                                                                                                                                                                                                                                                                                                                                        |
| #4  | MeSH descriptor: [Hand] explode all trees                                                                                                                                                                                                                                                                                                                                                                                                                                                                                       |
| #5  | (Hand* OR Palm* OR Finger* OR Thumb* OR Wrist*):ti,ab,kw                                                                                                                                                                                                                                                                                                                                                                                                                                                                        |
| #6  | #4 OR #5                                                                                                                                                                                                                                                                                                                                                                                                                                                                                                                        |
| #7  | MeSH descriptor: [Rehabilitation] explode all trees                                                                                                                                                                                                                                                                                                                                                                                                                                                                             |
| #8  | MeSH descriptor: [Exercise] explode all trees                                                                                                                                                                                                                                                                                                                                                                                                                                                                                   |
| #9  | MeSH descriptor: [Therapeutics] explode all trees                                                                                                                                                                                                                                                                                                                                                                                                                                                                               |
| #10 | (Rehab* OR Exercis* OR Therap* OR Treat*):ti,ab,kw                                                                                                                                                                                                                                                                                                                                                                                                                                                                              |
| #11 | ((electrical stimulation) OR FES OR (mirror therapy) OR (constraint-induced movement therapy) OR CIMT OR robot OR (brain-computer interface) OR BCI OR (repetitive transcranial magnetic stimulation) OR rTMS OR (transcranial direct current stimulation) OR tDCS OR (task-oriented training) OR (task-based training) OR acupuncture OR (bilateral treatment) OR (motor relearning) or (manual therapy) OR orthosis OR stretch OR biofeedback OR (virtual reality) OR VR OR (motor imagery) OR (action observation)):ti,ab,kw |
| #12 | #7 OR #8 OR #9 OR #10 OR #11                                                                                                                                                                                                                                                                                                                                                                                                                                                                                                    |
| #13 | #3 AND #6 AND #12 in Trials                                                                                                                                                                                                                                                                                                                                                                                                                                                                                                     |

### Screening of the studies

The reference management software, Endnote (version X9; Thomson Reuters, NY, USA), will be used to help upload, store and select the literature results. For each database, a separate library group will be created to keep all original search results. All separate library group copies will then merge into a new library group and duplicate checking will be carried out in the new library group using a Find Duplicates dialog box in the Endnote. Two independent reviewers (HWW, RA) will screen all the retrieved titles and abstracts according to the previously determined inclusion and exclusion criteria and full text will be screened to further confirm the final selection of the publications. Additional articles might be included by reference list check of the selected studies

1  
2  
3 and relevant published systematic reviews mentioned in search strategy. In case of any  
4 disagreements, a third reviewer (JY) will be referred to make a final decision. All reasons for  
5 exclusion of any publications will be noted. The PRISMA flow of information through the different  
6 phases of a systematic review will be filled in, to record the whole screening process in detail<sup>94 95</sup>.  
7  
8  
9

### 10 **Data extraction**

11 Two independent reviewers (HWW, RA) will carry out the data extraction following  
12 recommendations from the PRISMA statement<sup>94 95</sup>. Disagrees between the two reviewers will be  
13 solved by a third reviewer (JY) to reach a consensus. The extracted data will include general study  
14 information (authors, year of publication and ethics), characteristics of participants (sample size,  
15 inclusion/ exclusion criteria, random process and allocation, age, gender, type and time since the  
16 onset of the stroke), interventions (type of intervention, dose, duration, frequency, supervision and  
17 comparison/control group), outcome measures (observation time points, hand function assessments,  
18 hand movement kinematic analysis, quality of life changes, possible mental improvement, dropout,  
19 length of follow up, adverse events and conflict of interest). If necessary, the corresponding authors  
20 of the selected publications will be contacted for missing data and further information.  
21  
22  
23  
24

### 25 **Risk of bias**

26 The risk of bias of the included RCTs will be evaluated by the Cochrane Collaboration's tool  
27 (Table 8.5.a in the Cochrane Handbook for Systematic Reviews of Interventions)<sup>99</sup>. The Cochrane  
28 Collaboration's tool is a 6-item checklist, which includes sequence generation, allocation  
29 concealment, blinding, incomplete outcome data, selective outcome reporting and other sources of  
30 bias not issued in other domains mentioned above. For each item in the checklist, the risk of bias  
31 will be categorized as low (meet all criteria), unclear (insufficient detail reported in the publications)  
32 or high risk of bias (meet none of the criteria). Two independent reviewers (HWW, RA) will perform  
33 these judgements of risk of bias and disagreements will be resolved first by discussion and then by  
34 referring to a third reviewer author (JY) as an arbitrator when necessary.  
35  
36  
37  
38  
39

### 40 **Strategy for data synthesis**

41 We will provide a qualitative synthesis, in text and table, to summarize the main results of the  
42 selected publications. A narrative synthesis will be included to demonstrate the findings, structured  
43 around the type of intervention, target population characteristics, intervention content and types of  
44 outcome. We will check the heterogeneity of included studies by performing the  $\chi^2$  test (significant  
45 level: 0.1) and the  $I^2$  statistic (high levels of heterogeneity:  $I^2 \geq 50\%$ ). For studies that have  
46 sufficient data, and are homogeneous regarding the interventions and outcome measures, we will  
47 synthesize the results in meta-analysis using the Review Manager software (RevMan, Version 5.3).  
48 In case of substantial heterogeneity, only qualitative synthesis will be performed.  
49  
50  
51  
52

### 53 **Analyses of subgroups or subsets**

54 We will perform the subgroups analyses if sufficient data are available. These analyses will  
55 involve differences between the stroke phases (i.e. acute/subacute/chronic), the main therapeutic  
56 goal of treatment (i.e. aiming at the recovery of hand function/aiming at the recovery of arm and  
57 hand function), the measurement tools (e.g. activity measures/body function measures), intervention  
58 details (type, duration and delivery of the intervention), participation of patients in trials (active  
59  
60



movement training/passive training), and quality and risk of bias.

### Quality of evidence

According to the recommendations from the Cochrane Handbook for Systematic Reviews of Interventions<sup>99</sup>, the Grading of Recommendations Assessment, Development and Evaluation (GRADE) system will be used to assess the body of the evidence for all outcomes<sup>100</sup>. This system involves consideration of within-study risk of bias, consistency, directness of evidence, precision of effects estimates and publication bias. The overall quality of evidence will be adjudicated at four levels: high, moderate, low and very low (table 2).

Table 2 Quality of evidence and definitions

|                  |                                                                                                                                  |
|------------------|----------------------------------------------------------------------------------------------------------------------------------|
| High quality     | Further research is very unlikely to change the confidence in the estimate of effects.                                           |
| Moderate quality | Further research is likely to have an important impact on the confidence in the estimate of effect and may change the estimate   |
| Low quality      | Further research is very likely to have an important impact on the confidence in the effect and is likely to change the estimate |
| Very low quality | Any estimate of the effect is very uncertain                                                                                     |

### Ethics and dissemination

This systematic review does not need ethical approval and informed consent. Findings of this review will be disseminated via peer-reviewed publications and conference presentations.

### Patient and public involvement

No patient involved.

## DISCUSSION

Rehabilitation of hand motor function after stroke is different from other parts of the body like the lower extremity, trunk and even the proximal part of the upper limb, which recover faster and more completely<sup>101</sup>. The neural basis underlying the hand rehabilitation in moderate to severe stroke patients makes effective restoration of hand motor function extremely challenging, therefore, currently this cohort of stroke survivors is largely ignored for hand function rehabilitation. To date, there is also no systematic review or guideline that focuses extensively on the effectiveness of interventions to improve hand motor function in individuals with moderate to severe stroke. To the best of our knowledge, this is the first systematic review that concentrates on hand rehabilitation approaches in moderate to severe stroke patients and attempts to make a comprehensive analysis of the existing evidence to fill in the gaps in this research field.

This systematic review has several strengths. First, the preparation of this protocol is consistent with the methodology recommended by the Preferred Reporting Items for Systematic Reviews and Meta-Analyses Protocols and the Cochrane handbook for systematic reviews of interventions. Second, we only include RCTs which have recruited participants with moderate to severe hand function after stroke. This is because publications have provided us with convincing evidence that patients with baseline ability to control wrist and finger extension can achieve improvements in hand function and quality of life after receiving treatment procedures like modified CIMT<sup>12 13</sup>. However, there is no consensus on the effectiveness of intervention methods for stroke patients with

1  
2  
3 more severely impaired hand function. Third, more and more clinical trials on this topic have been  
4 published in recent decades, and the time for a systematic review is now.

5  
6 The results of this systematic review will provide a detailed summary of the current progress  
7 of evidence for interventions to improve hand motor function in individuals with moderate to severe  
8 stroke. Such a review can contribute by not only identifying the gaps, thus providing guidance for  
9 further research, but by also offering valuable information for therapeutics to help stroke survivors  
10 with impaired hand function.  
11  
12

#### 13 **Author affiliations**

14 <sup>1</sup>Department of Rehabilitation, Huashan Hospital, Fudan University, No. 12 Middle Wulumuqi Road, Shanghai 200040, China

15 <sup>2</sup>Northwestern University, Physical Therapy and Human Movement Sciences, 645 N Michigan Avenue, Suite 1100 Chicago IL  
16 60611

17  
18 **Contributors** JY is the lead and the guarantor of this review. HWW and RA conceptualized the review and drafted the manuscript.  
19 HWW and RA developed the search strategy included in the protocol. JJ, LD and SGC revised the protocol critically. All authors  
20 read and provided feedback on the draft and approved the final manuscript.

21  
22 **Funding** This research is funded by National Key R&D Program of China ( Grant No.2018YFC2002300 and 2018YFC2002301 ),  
23 the China National Nature Science Young Foundation (Grant No.81401859) and the Science and Technology Commission of  
24 Shanghai Municipality (Grant No. 15441901602 and 16441905303).

25  
26 **Competing interests** None declared.

27  
28 **Provenance and peer review** Not commissioned; externally peer reviewed

29  
30 **Data sharing statement** Unpublished data from this study will be available by contacting corresponding author. Unpublished data  
31 will be shared.

32  
33 **Open Access** This is an Open Access article distributed in accordance with the Creative Commons Attribution Non Commercial  
34 (CC BY-NC 4.0) license, which permits others to distribute, remix, adapt, build upon this work noncommercially, and license their  
35 derivative works on different terms, provided the original work is properly cited and the use is non-commercial. See: [http://](http://creativecommons.org/licenses/by-nc/4.0/)  
36 [creativecommons.org/licenses/by-nc/4.0/](http://creativecommons.org/licenses/by-nc/4.0/)

## 37 **REFERENCES**

- 38 1. Feigin VL, Krishnamurthi RV, Parmar P, et al. Update on the Global Burden of Ischemic and Hemorrhagic Stroke in 1990-  
39 2013: The GBD 2013 Study. *Neuroepidemiology* 2015;**45**(3):161-76.
- 40 2. Mayo NE, Wood-Dauphinee S, Ahmed S, et al. Disablement following stroke. *Disability and rehabilitation* 1999;**21**(5-6):258-  
41 68.
- 42 3. Kwakkel G, Kollen BJ, van der Grond J, et al. Probability of regaining dexterity in the flaccid upper limb: impact of severity of  
43 paresis and time since onset in acute stroke. *Stroke* 2003;**34**(9):2181-6.
- 44 4. Lee KB, Lim SH, Kim KH, et al. Six-month functional recovery of stroke patients: a multi-time-point study. *International*  
45 *journal of rehabilitation research Internationale Zeitschrift fur Rehabilitationsforschung Revue internationale de recherches de*  
46 *readaptation* 2015;**38**(2):173-80.
- 47 5. Ferraro M, Demaio JH, Krol J, et al. Assessing the motor status score: a scale for the evaluation of upper limb motor outcomes  
48 in patients after stroke. *Neurorehabilitation and neural repair* 2002;**16**(3):283-9.
- 49 6. Neumann DA. *Kinesiology of the musculoskeletal system-e-book: foundations for rehabilitation*: Elsevier Health Sciences, 2013.
- 50 7. Wolbrecht ET, Rowe JB, Chan V, et al. Finger strength, individuation, and their interaction: Relationship to hand function and  
51 corticospinal tract injury after stroke. *Clinical neurophysiology : official journal of the International Federation of Clinical*  
52 *Neurophysiology* 2018;**129**(4):797-808.

- 1
- 2
- 3
- 4 8. Hung CS, Hsieh YW, Wu CY, et al. The Effects of Combination of Robot-Assisted Therapy With Task-Specific or Impairment-
- 5 Oriented Training on Motor Function and Quality of Life in Chronic Stroke. *PM & R : the journal of injury, function, and*
- 6 *rehabilitation* 2016;**8**(8):721-9.
- 7
- 8 9. Wolf SL, Blanton S, Baer H, et al. Repetitive task practice: a critical review of constraint-induced movement therapy in stroke.
- 9 *Neurologist* 2002;**8**(6):325-38.
- 10
- 11 10. Wolf SL, Winstein CJ, Miller JP, et al. Effect of constraint-induced movement therapy on upper extremity function 3 to 9
- 12 months after stroke: the EXCITE randomized clinical trial. *JAMA* 2006;**296**(17):2095-104.
- 13
- 14 11. Taub E, Uswatte G, Elbert T. New treatments in neurorehabilitation founded on basic research. *Nat Rev Neurosci*
- 15 2002;**3**(3):228-36.
- 16
- 17 12. Kwakkel G, Veerbeek JM, van Wegen EE, et al. Constraint-induced movement therapy after stroke. *Lancet Neurol*
- 18 2015;**14**(2):224-34.
- 19
- 20 13. Morris DM, Crago JE, DeLuca SC, et al. Constraint-induced movement therapy for motor recovery after stroke.
- 21 *NeuroRehabilitation* 1997;**9**(1):29-43.
- 22
- 23 14. Hlustik P, Solodkin A, Gullapalli RP, et al. Somatotopy in human primary motor and somatosensory hand representations
- 24 revisited. *Cerebral cortex (New York, NY : 1991)* 2001;**11**(4):312-21.
- 25
- 26 15. Hamzei F, Dettmers C, Rijntjes M, et al. The effect of cortico-spinal tract damage on primary sensorimotor cortex activation
- 27 after rehabilitation therapy. 2008;**190**(3):329.
- 28
- 29 16. Johansen-Berg H, Rushworth MF, Bogdanovic MD, et al. The role of ipsilateral premotor cortex in hand movement after stroke.
- 30 *Proceedings of the National Academy of Sciences of the United States of America* 2002;**99**(22):14518-23.
- 31
- 32 17. Yao J, Drogos J, Veltink F, et al. The effect of transcranial direct current stimulation on the expression of the flexor synergy in
- 33 the paretic arm in chronic stroke is dependent on shoulder abduction loading. *Frontiers in human neuroscience* 2015;**9**:262.
- 34
- 35 18. Baker SN, Zaaimi B, Fisher KM, et al. Pathways mediating functional recovery. *Progress in brain research* 2015;**218**:389-
- 36 412.
- 37
- 38 19. Lawrence DG, Kuypers HG. The functional organization of the motor system in the monkey. I. The effects of bilateral
- 39 pyramidal lesions. *Brain : a journal of neurology* 1968;**91**(1):1-14.
- 40
- 41 20. Wilkins KB, Owen M, Ingo C, et al. Neural Plasticity in Moderate to Severe Chronic Stroke Following a Device-Assisted
- 42 Task-Specific Arm/Hand Intervention. *Front Neurol* 2017;**8**:284.
- 43
- 44 21. Lan Y, Yao J, Dewald JPA. The Impact of Shoulder Abduction Loading on Volitional Hand Opening and Grasping in Chronic
- 45 Hemiparetic Stroke. *Neurorehabilitation and neural repair* 2017;**31**(6):521-29.
- 46
- 47 22. Lang CE, Schieber MH. Reduced muscle selectivity during individuated finger movements in humans after damage to the
- 48 motor cortex or corticospinal tract. *Journal of neurophysiology* 2004;**91**(4):1722-33.
- 49
- 50 23. Camona C, Wilkins KB, Drogos J, et al. Improving Hand Function of Severely Impaired Chronic Hemiparetic Stroke
- 51 Individuals Using Task-Specific Training With the ReIn-Hand System: A Case Series. *Front Neurol* 2018;**9**:923.
- 52
- 53 24. Hayward K, Barker R, Brauer S. Interventions to promote upper limb recovery in stroke survivors with severe paresis: a
- 54 systematic review. *Disability and rehabilitation* 2010;**32**(24):1973-86.
- 55
- 56 25. Corbetta D, Sirtori V, Castellini G, et al. Constraint-induced movement therapy for upper extremities in people with stroke.
- 57 *The Cochrane database of systematic reviews* 2015(10):Cd004433.
- 58
- 59 26. Etoom M, Hawamdeh M, Hawamdeh Z, et al. Constraint-induced movement therapy as a rehabilitation intervention for upper
- 60 extremity in stroke patients: systematic review and meta-analysis. *International journal of rehabilitation research Internationale*
- Zeitschrift fur Rehabilitationsforschung Revue internationale de recherches de readaptation* 2016;**39**(3):197-210.
27. McIntyre A, Viana R, Janzen S, et al. Systematic review and meta-analysis of constraint-induced movement therapy in the
- hemiparetic upper extremity more than six months post stroke. *Topics in stroke rehabilitation* 2012;**19**(6):499-513.
28. Shi YX, Tian JH, Yang KH, et al. Modified constraint-induced movement therapy versus traditional rehabilitation in patients
- with upper-extremity dysfunction after stroke: a systematic review and meta-analysis. *Archives of physical medicine and*

- 1  
2  
3  
4  
5  
6  
7  
8  
9  
10  
11  
12  
13  
14  
15  
16  
17  
18  
19  
20  
21  
22  
23  
24  
25  
26  
27  
28  
29  
30  
31  
32  
33  
34  
35  
36  
37  
38  
39  
40  
41  
42  
43  
44  
45  
46  
47  
48  
49  
50  
51  
52  
53  
54  
55  
56  
57  
58  
59  
60
- rehabilitation* 2011;**92**(6):972-82.
29. Nijland R, Kwakkel G, Bakers J, et al. Constraint-induced movement therapy for the upper paretic limb in acute or sub-acute stroke: a systematic review. *International journal of stroke : official journal of the International Stroke Society* 2011;**6**(5):425-33.
30. Veerbeek JM, Langbroek-Amersfoort AC, van Wegen EE, et al. Effects of Robot-Assisted Therapy for the Upper Limb After Stroke. *Neurorehabilitation and neural repair* 2017;**31**(2):107-21.
31. Zhang C, Li-Tsang CW, Au RK. Robotic approaches for the rehabilitation of upper limb recovery after stroke: a systematic review and meta-analysis. *International journal of rehabilitation research Internationale Zeitschrift fur Rehabilitationsforschung Revue internationale de recherches de readaptation* 2017;**40**(1):19-28.
32. Bertani R, Melegari C, De Cola MC, et al. Effects of robot-assisted upper limb rehabilitation in stroke patients: a systematic review with meta-analysis. *Neurological sciences : official journal of the Italian Neurological Society and of the Italian Society of Clinical Neurophysiology* 2017;**38**(9):1561-69.
33. Babaiasl M, Mahdioun SH, Jaryani P, et al. A review of technological and clinical aspects of robot-aided rehabilitation of upper-extremity after stroke. *Disability and rehabilitation Assistive technology* 2016;**11**(4):263-80.
34. Prange GB, Jannink MJ, Groothuis-Oudshoorn CG, et al. Systematic review of the effect of robot-aided therapy on recovery of the hemiparetic arm after stroke. *Journal of rehabilitation research and development* 2006;**43**(2):171-84.
35. Mehrholz J, Platz T, Kugler J, et al. Electromechanical and robot-assisted arm training for improving arm function and activities of daily living after stroke. *The Cochrane database of systematic reviews* 2008(4):Cd006876.
36. Coupar F, Pollock A, van Wijck F, et al. Simultaneous bilateral training for improving arm function after stroke. *The Cochrane database of systematic reviews* 2010(4):Cd006432.
37. Latimer CP, Keeling J, Lin B, et al. The impact of bilateral therapy on upper limb function after chronic stroke: a systematic review. *Disability and rehabilitation* 2010;**32**(15):1221-31.
38. Timmermans AA, Spooren AI, Kingma H, et al. Influence of task-oriented training content on skilled arm-hand performance in stroke: a systematic review. *Neurorehabilitation and neural repair* 2010;**24**(9):858-70.
39. van der Lee JH, Snels IA, Beckerman H, et al. Exercise therapy for arm function in stroke patients: a systematic review of randomized controlled trials. *Clinical rehabilitation* 2001;**15**(1):20-31.
40. Eraifej J, Clark W, France B, et al. Effectiveness of upper limb functional electrical stimulation after stroke for the improvement of activities of daily living and motor function: a systematic review and meta-analysis. *Syst Rev* 2017;**6**(1):40.
41. Vafadar AK, Cote JN, Archambault PS. Effectiveness of functional electrical stimulation in improving clinical outcomes in the upper arm following stroke: a systematic review and meta-analysis. *BioMed research international* 2015;**2015**:729768.
42. Tyson SF, Kent RM. The effect of upper limb orthotics after stroke: a systematic review. *NeuroRehabilitation* 2011;**28**(1):29-36.
43. Lannin NA, Novak I, Cusick A. A systematic review of upper extremity casting for children and adults with central nervous system motor disorders. *Clinical rehabilitation* 2007;**21**(11):963-76.
44. Barclay-Goddard RE, Stevenson TJ, Poluha W, et al. Mental practice for treating upper extremity deficits in individuals with hemiparesis after stroke. *The Cochrane database of systematic reviews* 2011(5):Cd005950.
45. Guerra ZF, Lucchetti ALG, Lucchetti G. Motor Imagery Training After Stroke: A Systematic Review and Meta-analysis of Randomized Controlled Trials. *Journal of neurologic physical therapy : JNPT* 2017;**41**(4):205-14.
46. Ezendam D, Bongers RM, Jannink MJ. Systematic review of the effectiveness of mirror therapy in upper extremity function. *Disability and rehabilitation* 2009;**31**(26):2135-49.
47. Perez-Cruzado D, Merchan-Baeza JA, Gonzalez-Sanchez M, et al. Systematic review of mirror therapy compared with conventional rehabilitation in upper extremity function in stroke survivors. *Australian occupational therapy journal* 2017;**64**(2):91-112.
48. Thieme H, Morkisch N, Mehrholz J, et al. Mirror therapy for improving motor function after stroke. *The Cochrane database of systematic reviews* 2018;**7**:Cd008449.

- 1  
2  
3  
4  
5  
6  
7  
8  
9  
10  
11  
12  
13  
14  
15  
16  
17  
18  
19  
20  
21  
22  
23  
24  
25  
26  
27  
28  
29  
30  
31  
32  
33  
34  
35  
36  
37  
38  
39  
40  
41  
42  
43  
44  
45  
46  
47  
48  
49  
50  
51  
52  
53  
54  
55  
56  
57  
58  
59  
60
49. Elsner B, Kugler J, Pohl M, et al. Transcranial direct current stimulation (tDCS) for improving function and activities of daily living in patients after stroke. *The Cochrane database of systematic reviews* 2013(11):Cd009645.
50. Kandel M, Beis JM, Le Chapelain L, et al. Non-invasive cerebral stimulation for the upper limb rehabilitation after stroke: a review. *Ann Phys Rehabil Med* 2012;**55**(9-10):657-80.
51. Graef P, Dadalt MLR, Rodrigues D, et al. Transcranial magnetic stimulation combined with upper-limb training for improving function after stroke: A systematic review and meta-analysis. *Journal of the neurological sciences* 2016;**369**:149-58.
52. Tedesco Triccas L, Burridge JH, Hughes AM, et al. Multiple sessions of transcranial direct current stimulation and upper extremity rehabilitation in stroke: A review and meta-analysis. *Clinical neurophysiology : official journal of the International Federation of Clinical Neurophysiology* 2016;**127**(1):946-55.
53. Monge-Pereira E, Ibanez-Pereda J, Alguacil-Diego IM, et al. Use of Electroencephalography Brain-Computer Interface Systems as a Rehabilitative Approach for Upper Limb Function After a Stroke: A Systematic Review. *PM & R : the journal of injury, function, and rehabilitation* 2017;**9**(9):918-32.
54. Carvalho R, Dias N, Cerqueira JJ. Brain-machine interface of upper limb recovery in stroke patients rehabilitation: A systematic review. *Physiotherapy research international : the journal for researchers and clinicians in physical therapy* 2019:e1764.
55. Coupar F, Pollock A, Legg LA, et al. Home-based therapy programmes for upper limb functional recovery following stroke. *The Cochrane database of systematic reviews* 2012(5):Cd006755.
56. Pollock A, Farmer SE, Brady MC, et al. Interventions for improving upper limb function after stroke. *The Cochrane database of systematic reviews* 2014(11):Cd010820.
57. Urton ML, Kohia M, Davis J, et al. Systematic literature review of treatment interventions for upper extremity hemiparesis following stroke. *Occupational therapy international* 2007;**14**(1):11-27.
58. Platz T. [Evidence-based arm rehabilitation--a systematic review of the literature]. *Der Nervenarzt* 2003;**74**(10):841-9.
59. Hatem SM, Saussez G, Della Faille M, et al. Rehabilitation of Motor Function after Stroke: A Multiple Systematic Review Focused on Techniques to Stimulate Upper Extremity Recovery. *Frontiers in human neuroscience* 2016;**10**:442.
60. Pelton T, van Vliet P, Hollands K. Interventions for improving coordination of reach to grasp following stroke: a systematic review. *International journal of evidence-based healthcare* 2012;**10**(2):89-102.
61. Doyle S, Bennett S, Fasoli SE, et al. Interventions for sensory impairment in the upper limb after stroke. *The Cochrane database of systematic reviews* 2010(6):Cd006331.
62. Dong Y, Wu T, Hu X, et al. Efficacy and safety of botulinum toxin type A for upper limb spasticity after stroke or traumatic brain injury: a systematic review with meta-analysis and trial sequential analysis. *European journal of physical and rehabilitation medicine* 2017;**53**(2):256-67.
63. Salazar AP, Pinto C, Ruschel Mossi JV, et al. Effectiveness of static stretching positioning on post-stroke upper-limb spasticity and mobility: Systematic review with meta-analysis. *Ann Phys Rehabil Med* 2018.
64. Pulman J, Buckley E. Assessing the efficacy of different upper limb hemiparesis interventions on improving health-related quality of life in stroke patients: a systematic review. *Topics in stroke rehabilitation* 2013;**20**(2):171-88.
65. Arya KN, Pandian S, Puri V. Rehabilitation methods for reducing shoulder subluxation in post-stroke hemiparesis: a systematic review. *Topics in stroke rehabilitation* 2018;**25**(1):68-81.
66. Lee SH, Lim SM. Acupuncture for Poststroke Shoulder Pain: A Systematic Review and Meta-Analysis. *Evidence-based complementary and alternative medicine : eCAM* 2016;**2016**:3549878.
67. Nadler M, Pauls M. Shoulder orthoses for the prevention and reduction of hemiplegic shoulder pain and subluxation: systematic review. *Clinical rehabilitation* 2017;**31**(4):444-53.
68. Wattchow KA, McDonnell MN, Hillier SL. Rehabilitation Interventions for Upper Limb Function in the First Four Weeks Following Stroke: A Systematic Review and Meta-Analysis of the Evidence. *Archives of physical medicine and rehabilitation* 2018;**99**(2):367-82.
69. Hayward KS, Brauer SG. Dose of arm activity training during acute and subacute rehabilitation post stroke: a systematic review

- of the literature. *Clinical rehabilitation* 2015;**29**(12):1234-43.
70. Ashford S, Slade M, Malaprade F, et al. Evaluation of functional outcome measures for the hemiparetic upper limb: a systematic review. *Journal of rehabilitation medicine* 2008;**40**(10):787-95.
71. Beaulieu LD, Milot MH. Changes in transcranial magnetic stimulation outcome measures in response to upper-limb physical training in stroke: A systematic review of randomized controlled trials. *Ann Phys Rehabil Med* 2018;**61**(4):224-34.
72. Alt Murphy M, Resteghini C, Feys P, et al. An overview of systematic reviews on upper extremity outcome measures after stroke. *BMC neurology* 2015;**15**:29.
73. Sivan M, O'Connor RJ, Makower S, et al. Systematic review of outcome measures used in the evaluation of robot-assisted upper limb exercise in stroke. *Journal of rehabilitation medicine* 2011;**43**(3):181-9.
74. Santisteban L, Teremetz M, Bleton JP, et al. Upper Limb Outcome Measures Used in Stroke Rehabilitation Studies: A Systematic Literature Review. *PloS one* 2016;**11**(5):e0154792.
75. Velstra IM, Ballert CS, Cieza A. A systematic literature review of outcome measures for upper extremity function using the international classification of functioning, disability, and health as reference. *PM & R : the journal of injury, function, and rehabilitation* 2011;**3**(9):846-60.
76. Kumar P, Kathuria P, Nair P, et al. Prediction of Upper Limb Motor Recovery after Subacute Ischemic Stroke Using Diffusion Tensor Imaging: A Systematic Review and Meta-Analysis. *J Stroke* 2016;**18**(1):50-9.
77. Tedesco Triccas L, Kennedy N, Smith T, et al. Predictors of upper limb spasticity after stroke? A systematic review and meta-analysis. *Physiotherapy* 2019.
78. Ostolaza M, Abudarham J, Dilascio S, et al. [Hand fine motor skills and use of both hand and arm in subjects after a stroke: a systematic review]. *Revista de neurologia* 2017;**64**(7):289-98.
79. Grant VM, Gibson A, Shields N. Somatosensory stimulation to improve hand and upper limb function after stroke-a systematic review with meta-analyses. *Topics in stroke rehabilitation* 2018;**25**(2):150-60.
80. Yue Z, Zhang X, Wang J. Hand Rehabilitation Robotics on Poststroke Motor Recovery. *Behavioural neurology* 2017;**2017**:3908135.
81. Meilink A, Hemmen B, Seelen HA, et al. Impact of EMG-triggered neuromuscular stimulation of the wrist and finger extensors of the paretic hand after stroke: a systematic review of the literature. *Clinical rehabilitation* 2008;**22**(4):291-305.
82. McConnell AC, Moiola RC, Brasil FL, et al. Robotic devices and brain-machine interfaces for hand rehabilitation post-stroke. *Journal of rehabilitation medicine* 2017;**49**(6):449-60.
83. O'Brien AT, Bertolucci F, Torrealba-Acosta G, et al. Non-invasive brain stimulation for fine motor improvement after stroke: a meta-analysis. *European journal of neurology* 2018;**25**(8):1017-26.
84. Schick T, Schlake HP, Kallusky J, et al. Synergy effects of combined multichannel EMG-triggered electrical stimulation and mirror therapy in subacute stroke patients with severe or very severe arm/hand paresis. *Restorative neurology and neuroscience* 2017;**35**(3):319-32.
85. Rabadi MH, Aston CE. Effect of Transcranial Direct Current Stimulation on Severely Affected Arm-Hand Motor Function in Patients After an Acute Ischemic Stroke: A Pilot Randomized Control Trial. *American journal of physical medicine & rehabilitation* 2017;**96**(10 Suppl 1):S178-s84.
86. Takeuchi N, Tada T, Toshima M, et al. Inhibition of the unaffected motor cortex by 1 Hz repetitive transcranial magnetic stimulation enhances motor performance and training effect of the paretic hand in patients with chronic stroke. *Journal of Rehabilitation Medicine (Stiftelsen Rehabiliteringsinformation)* 2008;**40**(4):298-303.
87. Michielsen ME, Selles RW, van der Geest JN, et al. Motor recovery and cortical reorganization after mirror therapy in chronic stroke patients: a phase II randomized controlled trial. *Neurorehabilitation and neural repair* 2011;**25**(3):223-33.
88. Winstein CJ, Stein J, Arena R, et al. Guidelines for Adult Stroke Rehabilitation and Recovery: A Guideline for Healthcare Professionals From the American Heart Association/American Stroke Association. *Stroke* 2016;**47**(6):e98-e169.
89. Hebert D, Lindsay MP, McIntyre A, et al. Canadian stroke best practice recommendations: Stroke rehabilitation practice

- 1  
2  
3 guidelines, update 2015. *International journal of stroke : official journal of the International Stroke Society* 2016;**11**(4):459-84.
- 4 90. Foundation S. Clinical guidelines for stroke management 2017: Stroke Foundation Melbourne, Victoria, Australia, 2017.
- 5 91. National Clinical Guideline C. National Institute for Health and Care Excellence: Clinical Guidelines. Stroke Rehabilitation:  
6 Long Term Rehabilitation After Stroke. London: Royal College of Physicians (UK)  
7 National Clinical Guideline Centre., 2013.
- 8 92. Moher D, Shamseer L, Clarke M, et al. Preferred reporting items for systematic review and meta-analysis protocols (PRISMA-P)  
9 2015 statement. *Syst Rev* 2015;**4**:1.
- 10 93. Shamseer L, Moher D, Clarke M, et al. Preferred reporting items for systematic review and meta-analysis protocols (PRISMA-P)  
11 2015: elaboration and explanation. *BMJ (Clinical research ed)* 2015;**350**:g7647.
- 12 94. Liberati A, Altman DG, Tetzlaff J, et al. The PRISMA statement for reporting systematic reviews and meta-analyses of studies  
13 that evaluate health care interventions: explanation and elaboration. *Journal of clinical epidemiology* 2009;**62**(10):e1-34.
- 14 95. Moher D, Liberati A, Tetzlaff J, et al. Preferred reporting items for systematic reviews and meta-analyses: the PRISMA  
15 statement. *PLoS medicine* 2009;**6**(7):e1000097-e97.
- 16 96. Hatano S. Experience from a multicentre stroke register: a preliminary report. *Bulletin of the World Health Organization*  
17 1976;**54**(5):541-53.
- 18 97. Hayward KS, Schmidt J, Lohse KR, et al. Are we armed with the right data? Pooled individual data review of biomarkers in  
19 people with severe upper limb impairment after stroke. *NeuroImage Clinical* 2017;**13**:310-19.
- 20 98. Woytowicz EJ, Rietschel JC, Goodman RN, et al. Determining Levels of Upper Extremity Movement Impairment by Applying  
21 a Cluster Analysis to the Fugl-Meyer Assessment of the Upper Extremity in Chronic Stroke. *Archives of physical medicine and*  
22 *rehabilitation* 2017;**98**(3):456-62.
- 23 99. Higgins JP, Green S. Cochrane handbook for systematic reviews of interventions. 2008.
- 24 100. Guyatt GH, Oxman AD, Vist GE, et al. GRADE: an emerging consensus on rating quality of evidence and strength of  
25 recommendations. *BMJ (Clinical research ed)* 2008;**336**(7650):924-6.
- 26 101. Duruöz MT. *Hand function: a practical guide to assessment*. Springer, 2014.
- 27  
28  
29  
30  
31  
32  
33  
34  
35  
36  
37  
38  
39  
40  
41  
42  
43  
44  
45  
46  
47  
48  
49  
50  
51  
52  
53  
54  
55  
56  
57  
58  
59  
60

Supplementary Table 1 PRISMA checklist

| Section and topic                  | Item No | Checklist item                                                                                                                                                                                                                                      |
|------------------------------------|---------|-----------------------------------------------------------------------------------------------------------------------------------------------------------------------------------------------------------------------------------------------------|
| <b>Administrative information</b>  |         |                                                                                                                                                                                                                                                     |
| Title:                             |         |                                                                                                                                                                                                                                                     |
| Identification                     | 1a      | Identify the report as a protocol of a systematic review                                                                                                                                                                                            |
| Update                             | 1b      | If the protocol is for an update of a previous systematic review, identify as such                                                                                                                                                                  |
| Registration                       | 2       | If registered, provide the name of the registry (such as PROSPERO) and registration number                                                                                                                                                          |
| Authors:                           |         |                                                                                                                                                                                                                                                     |
| Contact                            | 3a      | Provide name, institutional affiliation, e-mail address of all protocol authors; provide physical mailing address of corresponding author                                                                                                           |
| Contributions                      | 3b      | Describe contributions of protocol authors and identify the guarantor of the review                                                                                                                                                                 |
| Amendments                         | 4       | If the protocol represents an amendment of a previously completed or published protocol, identify as such and list changes; otherwise, state plan for documenting important protocol amendments                                                     |
| Support:                           |         |                                                                                                                                                                                                                                                     |
| Sources                            | 5a      | Indicate sources of financial or other support for the review                                                                                                                                                                                       |
| Sponsor                            | 5b      | Provide name for the review funder and/or sponsor                                                                                                                                                                                                   |
| Role of sponsor or funder          | 5c      | Describe roles of funder(s), sponsor(s), and/or institution(s), if any, in developing the protocol                                                                                                                                                  |
| <b>Introduction</b>                |         |                                                                                                                                                                                                                                                     |
| Rationale                          | 6       | Describe the rationale for the review in the context of what is already known                                                                                                                                                                       |
| Objectives                         | 7       | Provide an explicit statement of the question(s) the review will address with reference to participants, interventions, comparators, and outcomes (PICO)                                                                                            |
| <b>Methods</b>                     |         |                                                                                                                                                                                                                                                     |
| Eligibility criteria               | 8       | Specify the study characteristics (such as PICO, study design, setting, time frame) and report characteristics (such as years considered, language, publication status) to be used as criteria for eligibility for the review                       |
| Information sources                | 9       | Describe all intended information sources (such as electronic databases, contact with study authors, trial registers or other grey literature sources) with planned dates of coverage                                                               |
| Search strategy                    | 10      | Present draft of search strategy to be used for at least one electronic database, including planned limits, such that it could be repeated                                                                                                          |
| Study records:                     |         |                                                                                                                                                                                                                                                     |
| Data management                    | 11a     | Describe the mechanism(s) that will be used to manage records and data throughout the review                                                                                                                                                        |
| Selection process                  | 11b     | State the process that will be used for selecting studies (such as two independent reviewers) through each phase of the review (that is, screening, eligibility and inclusion in meta-analysis)                                                     |
| Data collection process            | 11c     | Describe planned method of extracting data from reports (such as piloting forms, done independently, in duplicate), any processes for obtaining and confirming data from investigators                                                              |
| Data items                         | 12      | List and define all variables for which data will be sought (such as PICO items, funding sources), any pre-planned data assumptions and simplifications                                                                                             |
| Outcomes and prioritization        | 13      | List and define all outcomes for which data will be sought, including prioritization of main and additional outcomes, with rationale                                                                                                                |
| Risk of bias in individual studies | 14      | Describe anticipated methods for assessing risk of bias of individual studies, including whether this will be done at the outcome or study level, or both; state how this information will be used in data synthesis                                |
| Data synthesis                     | 15a     | Describe criteria under which study data will be quantitatively synthesised                                                                                                                                                                         |
|                                    | 15b     | If data are appropriate for quantitative synthesis, describe planned summary measures, methods of handling data and methods of combining data from studies, including any planned exploration of consistency (such as I <sup>2</sup> , Kendall's τ) |
|                                    | 15c     | Describe any proposed additional analyses (such as sensitivity or subgroup analyses, meta-regression)                                                                                                                                               |
|                                    | 15d     | If quantitative synthesis is not appropriate, describe the type of summary planned                                                                                                                                                                  |
| Meta-bias(es)                      | 16      | Specify any planned assessment of meta-bias(es) (such as publication bias across studies, selective reporting within studies)                                                                                                                       |
| Confidence in cumulative evidence  | 17      | Describe how the strength of the body of evidence will be assessed (such as GRADE)                                                                                                                                                                  |

| Item No | 1a | 1b  | 2   | 3a  | 3b | 4  | 5a | 5b  | 5c  | 6   | 7   | 8  | 9  |
|---------|----|-----|-----|-----|----|----|----|-----|-----|-----|-----|----|----|
| Page    | 1  | /   | 1   | 9   | 9  | /  | 9  | /   | /   | 3   | 4   | 5  | 6  |
| Line    | 6  | /   | 41  | 14  | 19 | /  | 23 | /   | /   | 15  | 46  | 7  | 7  |
| Item No | 10 | 11a | 11b | 11c | 12 | 13 | 14 | 15a | 15b | 15d | 15c | 16 | 17 |
| Page    | 6  | 6   | 6   | 7   | 7  | 5  | 7  | 7   | 7   | 7   | 7   | /  | 8  |
| Line    | 19 | 51  | 56  | 10  | 14 | 48 | 26 | 47  | 45  | 50  | 53  | /  | 9  |
